# Supplementary material for: The Relationship between Metabolically Healthy Obesity and the Risk of Cardiovascular Disease: A Systematic Review and Meta-Analysis
Source: PubMed Central journal article supplement (PMC6723711; doi:10.3390/jcm8081228), 2019-08-15
Supplement: jcm-08-01228-s001.pdf [file jcm-08-01228-s001.pdf]

## Supplementary Materials

### Appendix S1. PRISMA checklist.

| Section/topic             | # | Checklist item                                                                                                                                                                                                                                                                                              | Reported on page # |
|---------------------------|---|-------------------------------------------------------------------------------------------------------------------------------------------------------------------------------------------------------------------------------------------------------------------------------------------------------------|--------------------|
| <b>TITLE</b>              |   |                                                                                                                                                                                                                                                                                                             |                    |
| Title                     | 1 | Identify the report as a systematic review, meta-analysis, or both.                                                                                                                                                                                                                                         | 1                  |
| <b>ABSTRACT</b>           |   |                                                                                                                                                                                                                                                                                                             |                    |
| Structured summary        | 2 | Provide a structured summary including, as applicable: background; objectives; data sources; study eligibility criteria, participants, and interventions; study appraisal and synthesis methods; results; limitations; conclusions and implications of key findings; systematic review registration number. | 1                  |
| <b>INTRODUCTION</b>       |   |                                                                                                                                                                                                                                                                                                             |                    |
| Rationale                 | 3 | Describe the rationale for the review in the context of what is already known.                                                                                                                                                                                                                              | 1-2                |
| Objectives                | 4 | Provide an explicit statement of questions being addressed with reference to participants, interventions, comparisons, outcomes, and study design (PICOS).                                                                                                                                                  | 2                  |
| <b>METHODS</b>            |   |                                                                                                                                                                                                                                                                                                             |                    |
| Protocol and registration | 5 | Indicate if a review protocol exists, if and where it can be accessed (e.g., Web address), and, if available, provide registration information including registration number.                                                                                                                               | 2                  |
| Eligibility criteria      | 6 | Specify study characteristics (e.g., PICOS, length of follow-up) and report characteristics (e.g., years considered, language, publication status) used as criteria for eligibility, giving rationale.                                                                                                      | 2-3                |
| Information sources       | 7 | Describe all information sources (e.g., databases with dates of coverage, contact with study authors to identify additional studies) in the search and date last searched.                                                                                                                                  | 2-3                |
| Search                    | 8 | Present full electronic search strategy for at least one database, including any limits used, such that it could be repeated.                                                                                                                                                                               | 2-3,<br>Appendix   |

|                                    |    |                                                                                                                                                                                                                        |                    |
|------------------------------------|----|------------------------------------------------------------------------------------------------------------------------------------------------------------------------------------------------------------------------|--------------------|
|                                    |    |                                                                                                                                                                                                                        | S2                 |
| Study selection                    | 9  | State the process for selecting studies (i.e., screening, eligibility, included in systematic review, and, if applicable, included in the meta-analysis).                                                              | 3                  |
| Data collection process            | 10 | Describe method of data extraction from reports (e.g., piloted forms, independently, in duplicate) and any processes for obtaining and confirming data from investigators.                                             | 3                  |
| Data items                         | 11 | List and define all variables for which data were sought (e.g., PICOS, funding sources) and any assumptions and simplifications made.                                                                                  | 3                  |
| Risk of bias in individual studies | 12 | Describe methods used for assessing risk of bias of individual studies (including specification of whether this was done at the study or outcome level), and how this information is to be used in any data synthesis. | 3                  |
| Summary measures                   | 13 | State the principal summary measures (e.g., risk ratio, difference in means).                                                                                                                                          | 3                  |
| Synthesis of results               | 14 | Describe the methods of handling data and combining results of studies, if done, including measures of consistency (e.g., $I^2$ ) for each meta-analysis.                                                              | 3                  |
| Section/topic                      | #  | Checklist item                                                                                                                                                                                                         | Reported on page # |
| Risk of bias across studies        | 15 | Specify any assessment of risk of bias that may affect the cumulative evidence (e.g., publication bias, selective reporting within studies).                                                                           | 3                  |
| Additional analyses                | 16 | Describe methods of additional analyses (e.g., sensitivity or subgroup analyses, meta-regression), if done, indicating which were pre-specified.                                                                       | 3                  |
| <b>RESULTS</b>                     |    |                                                                                                                                                                                                                        |                    |
| Study selection                    | 17 | Give numbers of studies screened, assessed for eligibility, and included in the review, with reasons for exclusions at each stage, ideally with a flow diagram.                                                        | 4-5                |
| Study characteristics              | 18 | For each study, present characteristics for which data were extracted (e.g., study size, PICOS, follow-up period) and provide the citations.                                                                           | 4-5,<br>Table S2   |

|                               |    |                                                                                                                                                                                                          |                       |
|-------------------------------|----|----------------------------------------------------------------------------------------------------------------------------------------------------------------------------------------------------------|-----------------------|
| Risk of bias within studies   | 19 | Present data on risk of bias of each study and, if available, any outcome level assessment (see item 12).                                                                                                | 5-6, Table S1         |
| Results of individual studies | 20 | For all outcomes considered (benefits or harms), present, for each study: (a) simple summary data for each intervention group (b) effect estimates and confidence intervals, ideally with a forest plot. | 5-10                  |
| Synthesis of results          | 21 | Present the main results of the review. If meta-analyses are done, include for each, confidence intervals and measures of consistency                                                                    | 5-10                  |
| Risk of bias across studies   | 22 | Present results of any assessment of risk of bias across studies (see Item 15).                                                                                                                          | 7, 10, Figure S7, S17 |
| Additional analysis           | 23 | Give results of additional analyses, if done (e.g., sensitivity or subgroup analyses, meta-regression [see Item 16]).                                                                                    | 5-10                  |
| <b>DISCUSSION</b>             |    |                                                                                                                                                                                                          |                       |
| Summary of evidence           | 24 | Summarize the main findings including the strength of evidence for each main outcome; consider their relevance to key groups (e.g., healthcare providers, users, and policy makers).                     | 10-11                 |
| Limitations                   | 25 | Discuss limitations at study and outcome level (e.g., risk of bias), and at review-level (e.g., incomplete retrieval of identified research, reporting bias).                                            | 11-12                 |
| Conclusions                   | 26 | Provide a general interpretation of the results in the context of other evidence, and implications for future research.                                                                                  | 12                    |
| <b>FUNDING</b>                |    |                                                                                                                                                                                                          |                       |
| Funding                       | 27 | Describe sources of funding for the systematic review and other support (e.g., supply of data); role of funders for the systematic review.                                                               | N/A                   |

## Appendix S2. Search strategy.

Main results:

| Databases                | Articles | Date     | Others                                                                                |
|--------------------------|----------|----------|---------------------------------------------------------------------------------------|
| PubMed                   | 5101     | 20190409 |                                                                                       |
| Cochrane CDSR            | 19       | 20190409 |                                                                                       |
| Cochrane CENTRAL         | 716      | 20190409 | including registered clinical trials in clinicaltrials.gov (Started from March, 2019) |
| EMBASE                   | 5467     | 20190409 | Elsevier platform                                                                     |
| CINAHL                   | 788      | 20190409 |                                                                                       |
| Total                    | 12091    |          |                                                                                       |
| endnote duplicate        | 1439     |          |                                                                                       |
| Total without duplicated | 10652    |          |                                                                                       |

Keywords:

| PICOS |       | <u>MeSH terms</u> + free text word                                                                                                                    | <u>EMTree terms</u> + free text word                                                                           |
|-------|-------|-------------------------------------------------------------------------------------------------------------------------------------------------------|----------------------------------------------------------------------------------------------------------------|
| P     | adult |                                                                                                                                                       |                                                                                                                |
| I     | MHO   | <u>Obesity, Metabolically Benign</u> OR Metabolically Benign Obesity OR Metabolically Healthy Obesity OR MHO OR obesity paradox OR obesity phenotypes | <u>metabolically benign obesity</u> OR ' <u>obesity paradox</u> '/exp OR obesity paradox OR obesity phenotypes |

|       |       |                                                                                                                                                                                                                                                                                                                           |                                                                                                                                                                                                                                                                                                                         |
|-------|-------|---------------------------------------------------------------------------------------------------------------------------------------------------------------------------------------------------------------------------------------------------------------------------------------------------------------------------|-------------------------------------------------------------------------------------------------------------------------------------------------------------------------------------------------------------------------------------------------------------------------------------------------------------------------|
|       |       | <u>Overweight</u> OR <u>obesity</u> OR <u>obese</u> OR <u>BODY MASS INDEX</u> OR <u>BMI</u> OR <u>Quetelet Index</u> OR <u>fat*</u> OR <u>Body Weight</u> OR <u>Body Composition</u> OR <u>Anthropometry</u> OR <u>adiposity</u> OR <u>body composition</u> OR <u>body fat</u> OR <u>fatness</u> OR <u>body mass</u> AND  | <u>obesity</u> OR <u>adiposit*</u> OR <u>obesitas</u> OR <u>overweight</u> OR <u>obese</u> OR <u>fat</u> OR <u>body mass</u> OR <u>BMI</u> OR <u>body mass index</u> OR <u>Quetelet index</u> OR <u>Body Weight</u> OR <u>Body Composition</u> OR <u>anthropometry</u> OR <u>anthropometric</u> OR <u>adiposity</u> AND |
|       |       | <u>Metabolic*</u> AND                                                                                                                                                                                                                                                                                                     | <u>metaboli*</u> AND                                                                                                                                                                                                                                                                                                    |
|       |       | <u>normal</u> OR <u>healthy</u> OR <u>benign</u> OR <u>without</u> OR <u>absence</u>                                                                                                                                                                                                                                      | <u>normal</u> OR <u>healthy</u> OR <u>benign</u> OR <u>without</u> OR <u>absence</u>                                                                                                                                                                                                                                    |
| C     | MH-NW | metabolically healthy normal weight OR MHNW                                                                                                                                                                                                                                                                               |                                                                                                                                                                                                                                                                                                                         |
| O     | CVD   | <u>Cardiovascular Diseases</u> OR cardiovascular OR <u>myocardial infarction</u> OR coronary OR <u>heart failure</u> OR angina pectoris OR stroke OR CVD OR <u>Heart Diseases</u> OR Cardiac Disease OR <u>Vascular Diseases</u> OR Cerebrovascular Accident OR cerebrovascular disease OR <u>Carotid Artery Diseases</u> | <u>Cardiovascular Disease</u> OR angiocardio* cardiovascular OR <u>cerebrovascular accident</u>                                                                                                                                                                                                                         |
| Study |       | NOT ((letter[Publication Type]) OR editorial[Publication Type]))                                                                                                                                                                                                                                                          |                                                                                                                                                                                                                                                                                                                         |

Search strategy in Pubmed

| PICO | Search | Query                                                                                                                                                                                                                                                                                                                                                                                                                                                                                                                                                                                             | Items found | Time     |
|------|--------|---------------------------------------------------------------------------------------------------------------------------------------------------------------------------------------------------------------------------------------------------------------------------------------------------------------------------------------------------------------------------------------------------------------------------------------------------------------------------------------------------------------------------------------------------------------------------------------------------|-------------|----------|
| PIO  | #55    | Search ((((((((((Obesity, Metabolically Benign) OR Metabolically Benign Obesity) OR Metabolically Healthy Obesity) OR MHO[Title/Abstract] OR obesity paradox OR obesity phenotypes OR obesity phenotype*) OR (((((((((((((((Overweight) OR obesity) OR obese[Title/Abstract] OR Body Mass Index) OR BMI[Title/Abstract] OR Quetelet Index[Title/Abstract] OR fat[Title/Abstract] OR Body Weight) OR Body Composition) OR fatness[Title/Abstract] OR body mass[Title/Abstract] OR Anthropometry) OR adiposity)) AND ((normal[Text Word] OR healthy[Text Word] OR benign[Text Word] OR without[Text | 5101        | 01:02:13 |

|          |     |                                                                                                                                                                                                                                                                                                                                                                                                                                                                                                                                                                                              |         |          |
|----------|-----|----------------------------------------------------------------------------------------------------------------------------------------------------------------------------------------------------------------------------------------------------------------------------------------------------------------------------------------------------------------------------------------------------------------------------------------------------------------------------------------------------------------------------------------------------------------------------------------------|---------|----------|
|          |     | Word] OR absence[Text Word])) AND metabolic))) AND (((((((((((Carotid Artery Diseases OR Cardiovascular Diseases) OR myocardial infarction) OR coronary[Text Word]) OR heart failure) OR Cardiac Disease) OR angina pectoris[Text Word]) OR Vascular Diseases) OR Cardiovascular[Text Word]) OR CVD[Title/Abstract]) OR heart diseases OR cerebrovascular disease) OR stroke[Text Word]) OR All cause[Title/Abstract])) AND (((((((Mortality) OR mortalit*[Title/Abstract]) OR Morbidity) OR Morbidities[Text Word]) OR Incidence) OR incident[Title/Abstract]) OR death[Title/Abstract])))) |         |          |
| <b>O</b> | #47 | Search (((((((Mortality) OR mortalit*[Title/Abstract]) OR Morbidity) OR Morbidities[Text Word]) OR Incidence) OR incident[Title/Abstract]) OR death[Title/Abstract]                                                                                                                                                                                                                                                                                                                                                                                                                          | 3694056 | 22:48:17 |
|          | #46 | Search death[Title/Abstract]                                                                                                                                                                                                                                                                                                                                                                                                                                                                                                                                                                 | 649576  | 22:47:56 |
|          | #45 | Search incident[Title/Abstract]                                                                                                                                                                                                                                                                                                                                                                                                                                                                                                                                                              | 72176   | 22:47:43 |
|          | #44 | Search Incidence                                                                                                                                                                                                                                                                                                                                                                                                                                                                                                                                                                             | 2685548 | 22:46:34 |
|          | #43 | Search Morbidities[Text Word]                                                                                                                                                                                                                                                                                                                                                                                                                                                                                                                                                                | 21244   | 22:46:10 |
|          | #42 | Search Morbidity                                                                                                                                                                                                                                                                                                                                                                                                                                                                                                                                                                             | 2537043 | 22:45:26 |
|          | #41 | Search mortalit*[Title/Abstract]                                                                                                                                                                                                                                                                                                                                                                                                                                                                                                                                                             | 688051  | 22:45:07 |
|          | #40 | Search Mortality                                                                                                                                                                                                                                                                                                                                                                                                                                                                                                                                                                             | 1151016 | 22:44:47 |
| <b>I</b> | #39 | Search (((((((((((Cardiovascular Diseases) OR myocardial infarction) OR coronary[Text Word]) OR heart failure) OR Cardiac Disease) OR angina pectoris[Text Word]) OR Vascular Diseases) OR Cardiovascular[Text Word]) OR CVD[Title/Abstract]) OR heart diseases) OR stroke[Text Word]) OR All cause[Title/Abstract]                                                                                                                                                                                                                                                                          | 2808604 | 22:43:03 |
|          | #56 | Search cerebrovascular disease                                                                                                                                                                                                                                                                                                                                                                                                                                                                                                                                                               | 364638  | 01:01:59 |
|          | #53 | Search Carotid Artery Diseases Sort by: [pubsolr12]                                                                                                                                                                                                                                                                                                                                                                                                                                                                                                                                          | 52326   | 22:56:19 |
|          | #38 | Search All cause[Title/Abstract]                                                                                                                                                                                                                                                                                                                                                                                                                                                                                                                                                             | 39382   | 22:41:54 |
|          | #37 | Search stroke[Text Word]                                                                                                                                                                                                                                                                                                                                                                                                                                                                                                                                                                     | 262261  | 22:20:35 |
|          | #36 | Search heart diseases                                                                                                                                                                                                                                                                                                                                                                                                                                                                                                                                                                        | 1155486 | 22:20:15 |
|          | #35 | Search CVD[Title/Abstract]                                                                                                                                                                                                                                                                                                                                                                                                                                                                                                                                                                   | 30938   | 22:18:54 |
|          | #34 | Search Cardiovascular[Text Word]                                                                                                                                                                                                                                                                                                                                                                                                                                                                                                                                                             | 521576  | 22:18:17 |

|          |     |                                                                                                                                                                                                                                                                                                                                                                                                                                                                                                                                                                                                                                             |         |          |
|----------|-----|---------------------------------------------------------------------------------------------------------------------------------------------------------------------------------------------------------------------------------------------------------------------------------------------------------------------------------------------------------------------------------------------------------------------------------------------------------------------------------------------------------------------------------------------------------------------------------------------------------------------------------------------|---------|----------|
|          | #33 | Search Vascular Diseases                                                                                                                                                                                                                                                                                                                                                                                                                                                                                                                                                                                                                    | 1650271 | 22:17:14 |
|          | #32 | Search angina pectoris[Text Word]                                                                                                                                                                                                                                                                                                                                                                                                                                                                                                                                                                                                           | 41334   | 22:16:48 |
|          | #31 | Search Cardiac Disease                                                                                                                                                                                                                                                                                                                                                                                                                                                                                                                                                                                                                      | 1215546 | 22:16:19 |
|          | #30 | Search heart failure                                                                                                                                                                                                                                                                                                                                                                                                                                                                                                                                                                                                                        | 234112  | 22:16:03 |
|          | #29 | Search coronary[Text Word]                                                                                                                                                                                                                                                                                                                                                                                                                                                                                                                                                                                                                  | 476564  | 22:15:47 |
|          | #28 | Search myocardial infarction                                                                                                                                                                                                                                                                                                                                                                                                                                                                                                                                                                                                                | 237516  | 22:14:44 |
|          | #26 | Search Cardiovascular Diseases                                                                                                                                                                                                                                                                                                                                                                                                                                                                                                                                                                                                              | 2311218 | 22:13:24 |
| <b>P</b> | #25 | Search (((((Obesity, Metabolically Benign) OR Metabolically Benign Obesity) OR Metabolically Healthy Obesity) OR MHO[Title/Abstract] OR obesity paradox OR obesity phenotypes OR obesity phenotype*) OR (((((((((((Overweight) OR obesity) OR obese[Title/Abstract]) OR Body Mass Index) OR BMI[Title/Abstract]) OR Quetelet Index[Title/Abstract]) OR fat[Title/Abstract]) OR Body Weight) OR Body Composition) OR fatness[Title/Abstract]) OR body mass[Title/Abstract]) OR Anthropometry) OR adiposity)) AND ((normal[Text Word] OR healthy[Text Word] OR benign[Text Word] OR without[Text Word] OR absence[Text Word])) AND metabolic) | 31687   | 22:12:49 |
|          | #24 | Search (((((((((((Overweight) OR obesity) OR obese[Title/Abstract]) OR Body Mass Index) OR BMI[Title/Abstract]) OR Quetelet Index[Title/Abstract]) OR fat[Title/Abstract]) OR Body Weight) OR Body Composition) OR fatness[Title/Abstract]) OR body mass[Title/Abstract]) OR Anthropometry) OR adiposity)) AND ((normal[Text Word] OR healthy[Text Word] OR benign[Text Word] OR without[Text Word] OR absence[Text Word])) AND metabolic                                                                                                                                                                                                   | 30131   | 22:12:29 |
|          | #23 | Search metabolic                                                                                                                                                                                                                                                                                                                                                                                                                                                                                                                                                                                                                            | 549733  | 22:12:19 |
|          | #22 | Search (normal[Text Word] OR healthy[Text Word] OR benign[Text Word] OR without[Text Word] OR absence[Text Word])                                                                                                                                                                                                                                                                                                                                                                                                                                                                                                                           | 2889081 | 22:11:57 |
|          | #19 | Search (((((((((((Overweight) OR obesity) OR obese[Title/Abstract]) OR Body Mass Index) OR BMI[Title/Abstract]) OR Quetelet Index[Title/Abstract]) OR fat[Title/Abstract]) OR Body Weight) OR Body Composition) OR fatness[Title/Abstract]) OR body mass[Title/Abstract]) OR Anthropometry) OR adiposity                                                                                                                                                                                                                                                                                                                                    | 1152315 | 22:08:44 |

|  |     |                                                             |        |          |
|--|-----|-------------------------------------------------------------|--------|----------|
|  | #18 | Search adiposity                                            | 26717  | 22:07:56 |
|  | #17 | Search Anthropometry                                        | 488634 | 22:07:36 |
|  | #16 | Search body mass[Title/Abstract]                            | 192274 | 22:06:08 |
|  | #15 | Search fatness[Title/Abstract]                              | 3988   | 22:05:45 |
|  | #14 | Search Body Composition                                     | 83042  | 22:05:12 |
|  | #13 | Search Body Weight                                          | 603456 | 22:04:55 |
|  | #12 | Search fat[Title/Abstract]                                  | 239725 | 22:02:33 |
|  | #11 | Search Quetelet Index[Title/Abstract]                       | 487    | 22:02:13 |
|  | #10 | Search BMI[Title/Abstract]                                  | 127098 | 22:01:56 |
|  | #9  | Search Body Mass Index                                      | 219076 | 22:01:05 |
|  | #8  | Search obese[Title/Abstract]                                | 114942 | 22:00:21 |
|  | #7  | Search obesity                                              | 301266 | 22:00:02 |
|  | #6  | Search Overweight                                           | 222704 | 21:59:45 |
|  | #5  | obesity paradox OR obesity phenotypes OR obesity phenotype* | 13269  |          |
|  | #4  | Search MHO[Title/Abstract]                                  | 508    | 21:55:40 |
|  | #3  | Search Metabolically Healthy Obesity                        | 952    | 21:54:58 |
|  | #2  | Search Metabolically Benign Obesity                         | 192    | 21:54:47 |
|  | #1  | Search Obesity, Metabolically Benign                        | 192    | 21:54:33 |

#### Search strategy in Embase

| PICO | Search | Query                                                                                                                                  | Items found |
|------|--------|----------------------------------------------------------------------------------------------------------------------------------------|-------------|
|      | #41    | #38 AND ('Article'/it OR 'Article in Press'/it OR 'Conference Paper'/it OR 'Conference Review'/it OR 'Review'/it OR 'Short Survey'/it) | 5467        |
|      | #40    | #38 AND 'Conference Abstract'/it                                                                                                       | 4306        |
| PICO | #39    | #20 AND #30 AND #38                                                                                                                    | 9936        |
| O    | #38    | #30 OR #31 OR #32 OR #33 OR #34 OR #35 OR #36                                                                                          | 3043929     |



|   |     |                                                                                                                                                                                                                    |         |
|---|-----|--------------------------------------------------------------------------------------------------------------------------------------------------------------------------------------------------------------------|---------|
|   | #37 | incidence:ti,ab OR incident:ti,ab                                                                                                                                                                                  | 1035680 |
|   | #36 | 'incidence'/exp                                                                                                                                                                                                    | 410146  |
|   | #35 | morbidities:ti,ab                                                                                                                                                                                                  | 44807   |
|   | #34 | 'morbidity'/exp                                                                                                                                                                                                    | 333697  |
|   | #33 | mortalit*:ti,ab                                                                                                                                                                                                    | 981914  |
|   | #32 | 'death':ab,ti                                                                                                                                                                                                      | 891974  |
|   | #31 | 'mortality'/exp                                                                                                                                                                                                    | 985538  |
| I | #30 | #28 OR #29                                                                                                                                                                                                         | 5118917 |
|   | #29 | all NEXT/2 cause                                                                                                                                                                                                   | 68691   |
|   | #28 | #21 OR #22 OR #23 OR #24 OR #25 OR #26 OR #27                                                                                                                                                                      | 5100231 |
|   | #27 | 'cardiovascular':ab,ti OR 'myocardial':ab,ti OR 'coronary':ab,ti OR 'heart':ab,ti OR 'angina pectoris':ab,ti<br>OR 'stroke':ab,ti OR 'cvd':ab,ti OR 'cardiac':ab,ti OR 'vascular':ab,ti OR 'cerebrovascular':ab,ti | 3032451 |
|   | #26 | 'carotid artery disease'/exp                                                                                                                                                                                       | 64684   |
|   | #25 | 'cerebrovascular accident'/exp                                                                                                                                                                                     | 298467  |
|   | #24 | 'vascular disease'/exp                                                                                                                                                                                             | 2505922 |
|   | #23 | 'myocardial disease'/exp                                                                                                                                                                                           | 350364  |
|   | #22 | 'heart disease'/exp                                                                                                                                                                                                | 1827728 |
|   | #21 | 'cardiovascular disease'/exp                                                                                                                                                                                       | 4078463 |
| P | #20 | #1 OR #2 OR #3 OR #4 OR #5 OR #6 OR #19                                                                                                                                                                            | 90677   |
|   | #19 | #6 AND #16 AND #17                                                                                                                                                                                                 | 87782   |
|   | #18 | 'normal':ti,ab,kw OR 'healthy':ti,ab,kw OR 'benign':ti,ab,kw OR 'without':ti,ab,kw OR 'absence':ti,ab,kw                                                                                                           | 5632775 |
|   | #17 | #7 OR #8 OR #9 OR #10 OR #11 OR #12 OR #13 OR #14 OR #15 OR #16                                                                                                                                                    | 1564413 |
|   | #16 | 'anthropometric':ti,ab,kw OR 'adiposity':ti,ab,kw                                                                                                                                                                  | 84531   |
|   | #15 | 'anthropometry'/exp                                                                                                                                                                                                | 78307   |
|   | #14 | 'body composition'/exp                                                                                                                                                                                             | 92941   |
|   | #13 | 'body weight'/exp                                                                                                                                                                                                  | 623402  |

|  |     |                                                                                                            |         |
|--|-----|------------------------------------------------------------------------------------------------------------|---------|
|  | #12 | 'bmi':ti,ab,kw OR 'body mass index':ti,ab,kw OR 'body mass':ti,ab,kw                                       | 422618  |
|  | #11 | 'body mass'/exp                                                                                            | 367311  |
|  | #10 | 'obesity':ti,ab,kw                                                                                         | 335780  |
|  | #9  | 'adiposit*':ti,ab,kw OR 'obesitas':ti,ab,kw OR 'overweight':ti,ab,kw OR 'obese':ti,ab,kw OR 'fat':ti,ab,kw | 508795  |
|  | #8  | 'obesity'/exp                                                                                              | 471232  |
|  | #7  | metaboli*:ti,ab                                                                                            | 1380617 |
|  | #6  | 'obesity phenotypes' OR (('obesity'/exp OR obesity) AND phenotypes)                                        | 6568    |
|  | #5  | obesity NEAR/3 paradox                                                                                     | 1730    |
|  | #4  | obesity paradox'/exp                                                                                       | 28      |
|  | #3  | mho:ti,ab                                                                                                  | 794     |
|  | #2  | 'metabolically healthy obesity'/exp                                                                        | 80      |
|  | #1  | 'metabolically benign obesity'/exp                                                                         | 42      |

#### Search strategy in Cochrane Library

| PICO     | Search | Query                                                                                                                                                                                                                                   |
|----------|--------|-----------------------------------------------------------------------------------------------------------------------------------------------------------------------------------------------------------------------------------------|
|          | #1     | MeSH descriptor: [Obesity, Metabolically Benign] explode all trees                                                                                                                                                                      |
|          | #2     | (Metabolically Healthy Obesity):ti,ab,kw OR (Metabolically Benign Obesity):ti,ab,kw OR (MHO):ti,ab,kw OR (obesity paradox):ti,ab,kw OR obesity paradox OR obesity phenotypes OR obesity phenotype* (Word variations have been searched) |
|          | #3     | #1 OR #2                                                                                                                                                                                                                                |
|          | #4     | (Overweight OR obesity OR obese OR Body Mass Index OR BMI OR Quetelet Index OR fat OR Body Weight OR Body Composition OR fatness OR body mass OR Anthropometry OR adiposity):ti,ab,kw (Word variations have been searched)              |
|          | #5     | (metaboli*):ti,ab,kw (Word variations have been searched)                                                                                                                                                                               |
|          | #6     | (normal OR healthy OR benign OR without OR absence):ti,ab,kw (Word variations have been searched)                                                                                                                                       |
|          | #7     | #4 AND #5 AND #6                                                                                                                                                                                                                        |
| <b>P</b> | #8     | #3 OR #7                                                                                                                                                                                                                                |

|            |            |                                                                                                                                 |
|------------|------------|---------------------------------------------------------------------------------------------------------------------------------|
|            | #9         | MeSH descriptor: [Cardiovascular Diseases] explode all trees                                                                    |
|            | #10        | MeSH descriptor: [Heart Diseases] explode all trees                                                                             |
|            | #11        | MeSH descriptor: [Vascular Diseases] explode all trees                                                                          |
|            | #12        | MeSH descriptor: [Myocardial Infarction] explode all trees                                                                      |
|            | #13        | (cardiovascular OR myocardial OR coronary OR stroke OR CVD):ti,ab,kw (Word variations have been searched)                       |
|            | #14        | (Heart OR Cardiac OR Vascular OR Cerebrovascular):ti,ab,kw (Word variations have been searched)                                 |
|            | #15        | (all cause):ti,ab,kw (Word variations have been searched)                                                                       |
| <b>I</b>   | #16        | #9 OR #10 OR #11 OR #12 OR #13 OR #14 OR #15                                                                                    |
|            | #17        | MeSH descriptor: [Mortality] explode all trees                                                                                  |
|            | #18        | MeSH descriptor: [Morbidity] explode all trees                                                                                  |
|            | #19        | MeSH descriptor: [Incidence] explode all trees                                                                                  |
|            | #20        | (Morbidity OR Morbidities OR Mortality OR mortalities OR Death Rate OR Incidence):ti,ab,kw (Word variations have been searched) |
| <b>O</b>   | #21        | #17 OR #18 OR #19 OR #20                                                                                                        |
| <b>PIO</b> | <b>#22</b> | <b>#8 AND #16 AND #21</b>                                                                                                       |

### **Appendix S3. List of included and excluded studies.**

#### Included studies by hand-made searching

1. Hosseinpanah, F.; Barzin, M.; Sheikholeslami, F.; Azizi, F. Effect of different obesity phenotypes on cardiovascular events in tehran lipid and glucose study (tlgs). *Am. J. Cardiol.* **2011**, *107*, 412-416.
2. Flint, A.J.; Hu, F.B.; Glynn, R.J.; Caspard, H.; Manson, J.E.; Willett, W.C.; Rimm, E.B. Excess weight and the risk of incident coronary heart disease among men and women. *Obesity* **2010**, *18*, 377-383.

#### Included studies by databases searching

1. Kip, K.E.; Marroquin, O.C.; Kelley, D.E.; Johnson, B.D.; Kelsey, S.F.; Shaw, L.J.; Rogers, W.J.; Reis, S.E. Clinical importance of obesity versus the metabolic syndrome in cardiovascular risk in women: A report from the women's ischemia syndrome evaluation (wise) study. *Circulation* **2004**, *109*, 706-713.
2. Katzmarzyk, P.T.; Church, T.S.; Janssen, I.; Ross, R.; Blair, S.N. Metabolic syndrome, obesity, and mortality: Impact of cardiorespiratory fitness. *Diabetes Care* **2005**, *28*, 391-397.
3. St-Pierre, A.C.; Cantin, B.; Mauriege, P.; Bergeron, J.; Dagenais, G.R.; Despres, J.P.; Lamarche, B. Insulin resistance syndrome, body mass index and the risk of ischemic heart disease. *CMAJ* **2005**, *172*, 1301-1305.
4. Katzmarzyk, P.T.; Janssen, I.; Ross, R.; Church, T.S.; Blair, S.N. The importance of waist circumference in the definition of metabolic syndrome. *Prospective analyses of mortality in men* **2006**, *29*, 404-409.
5. Meigs, J.B.; Wilson, P.W.F.; Fox, C.S.; Vasan, R.S.; Nathan, D.M.; Sullivan, L.M.; D'Agostino, R.B. Body mass index, metabolic syndrome, and risk of type 2 diabetes or cardiovascular disease. *Journal of Clinical Endocrinology and Metabolism* **2006**, *91*, 2906-2912.
6. Song, Y.; Manson, J.E.; Meigs, J.B.; Ridker, P.M.; Buring, J.E.; Liu, S. Comparison of usefulness of body mass index versus metabolic risk factors in predicting 10-year risk of cardiovascular events in women. *American Journal of Cardiology* **2007**, *100*, 1654-1658.
7. Kuk, J.L.; Ardern, C.I. Are metabolically normal but obese individuals at lower risk for all-cause mortality? *Diabetes Care* **2009**, *32*, 2297-2299.
8. Arnlov, J.; Ingelsson, E.; Sundstrom, J.; Lind, L. Impact of body mass index and the metabolic syndrome on the risk of cardiovascular disease and death in middle-aged men. *Circulation* **2010**, *121*, 230-236.
9. Flint, A.J.; Hu, F.B.; Glynn, R.J.; Caspard, H.; Manson, J.E.; Willett, W.C.; Rimm, E.B. Excess weight and the risk of incident coronary heart disease among men and women. *Obesity* **2010**, *18*, 377-383.
10. Hosseinpanah, F.; Barzin, M.; Sheikholeslami, F.; Azizi, F. Effect of different obesity phenotypes on cardiovascular events in tehran lipid and glucose study (tlgs). *Am J Cardiol* **2011**, *107*, 412-416.

11. Voulgari, C.; Tentolouris, N.; Dilaveris, P.; Tousoulis, D.; Katsilambros, N.; Stefanadis, C. Increased heart failure risk in normal-weight people with metabolic syndrome compared with metabolically healthy obese individuals. *Journal of the American College of Cardiology* **2011**, *58*, 1343-1350.
12. Bo, S.; Musso, G.; Gambino, R.; Vilhois, P.; Gentile, L.; Durazzo, M.; Cavallo-Perin, P.; Cassader, M. Prognostic implications for insulin-sensitive and insulin-resistant normal-weight and obese individuals from a population-based cohort. *Am. J. Clin. Nutr.* **2012**, *96*, 962-969.
13. Durward, C.M.; Hartman, T.J.; Nickols-Richardson, S.M. All-cause mortality risk of metabolically healthy obese individuals in nhanes iii. *Journal of Obesity* **2012**, *2012*.
14. Ogorodnikova, A.D.; Kim, M.; McGinn, A.P.; Muntner, P.; Khan, U.; Wildman, R.P. Incident cardiovascular disease events in metabolically benign obese individuals. *Obesity* **2012**, *20*, 651-659.
15. Appleton, S.L.; Seaborn, C.J.; Visvanathan, R.; Hill, C.L.; Gill, T.K.; Taylor, A.W.; Adams, R.J.; North West Adelaide Health Study, T. Diabetes and cardiovascular disease outcomes in the metabolically healthy obese phenotype: A cohort study. *Diabetes Care* **2013**, *36*, 2388-2394.
16. Choi, K.M.; Cho, H.J.; Choi, H.Y.; Yang, S.J.; Yoo, H.J.; Seo, J.A.; Kim, S.G.; Baik, S.H.; Choi, D.S.; Kim, N.H. Higher mortality in metabolically obese normal-weight people than in metabolically healthy obese subjects in elderly koreans. *Clinical Endocrinology* **2013**, *79*, 364-370.
17. Hanks, L.J.; Tanner, R.M.; Muntner, P.; Kramer, H.; McClellan, W.M.; Warnock, D.G.; Judd, S.E.; Gutiérrez, O.M. Metabolic subtypes and risk of mortality in normal weight, overweight, and obese individuals with ckd. *Clinical Journal of the American Society of Nephrology* **2013**, *8*, 2064-2071.
18. Hinnouho, G.M.; Czernichow, S.; Dugravot, A.; Batty, G.D.; Kivimaki, M.; Singh-Manoux, A. Metabolically healthy obesity and risk of mortality: Does the definition of metabolic health matter? *Diabetes Care* **2013**, *36*, 2294-2300.
19. Ortega, F.B.; Lee, D.C.; Katzmarzyk, P.T.; Ruiz, J.R.; Sui, X.; Church, T.S.; Blair, S.N. The intriguing metabolically healthy but obese phenotype: Cardiovascular prognosis and role of fitness. *European Heart Journal* **2013**, *34*, 389-397.
20. Aung, K.; Lorenzo, C.; Hinojosa, M.A.; Haffner, S.M. Risk of developing diabetes and cardiovascular disease in metabolically unhealthy normal-weight and metabolically healthy obese individuals. *Journal of Clinical Endocrinology and Metabolism* **2014**, *99*, 462-468.
21. Morkedal, B.; Vatten, L.J.; Romundstad, P.R.; Laugsand, L.E.; Janszky, I. Risk of myocardial infarction and heart failure among metabolically healthy but obese individuals: Hunt (nord-trondelag health study), norway. *J Am Coll Cardiol* **2014**, *63*, 1071-1078.
22. Thomsen, M.; Nordestgaard, B.G. Myocardial infarction and ischemic heart disease in overweight and obesity with and without metabolic syndrome. *JAMA Internal Medicine* **2014**, *174*, 15-22.
23. van der, A.D.; Nooyens, A.C.; van Duijnhoven, F.J.; Verschuren, M.M.; Boer, J.M. All-cause mortality risk of metabolically healthy abdominal obese individuals: The epic-morgen study. *Obesity (Silver Spring)* **2014**, *22*, 557-564.
24. Hinnouho, G.M.; Czernichow, S.; Dugravot, A.; Nabi, H.; Brunner, E.J.; Kivimaki, M.; Singh-Manoux, A. Metabolically healthy obesity and the risk of

- cardiovascular disease and type 2 diabetes: The whitehall ii cohort study. *European Heart Journal* **2015**, *36*, 551-559.
25. Mirbolouk, M.; Asgari, S.; Sheikholeslami, F.; Mirbolouk, F.; Azizi, F.; Hadaegh, F. Different obesity phenotypes, and incident cardiovascular disease and mortality events in elderly iranians: Tehran lipid and glucose study. *Geriatrics and Gerontology International* **2015**, *15*, 449-456.
  26. Twig, G.; Gerstein, H.C.; Shor, D.B.A.; Derazne, E.; Tzur, D.; Afek, A.; Tirosh, A. Coronary artery disease risk among obese metabolically healthy young men. *European Journal of Endocrinology* **2015**, *173*, 305-312.
  27. Cheng, F.W.; Gao, X.; Mitchell, D.C.; Wood, C.; Rolston, D.D.; Still, C.D.; Jensen, G.L. Metabolic health status and the obesity paradox in older adults. *J. Nutr. Gerontol. Geriatr.* **2016**, *35*, 161-176.
  28. Dhana, K.; Koolhaas, C.M.; Van Rossum, E.F.C.; Ikram, M.A.; Hofman, A.; Kavousi, M.; Franco, O.H. Metabolically healthy obesity and the risk of cardiovascular disease in the elderly population. *PLoS ONE* **2016**, *11*.
  29. Guo, F.; Garvey, W.T. Cardiometabolic disease risk in metabolically healthy and unhealthy obesity: Stability of metabolic health status in adults. *Obesity* **2016**, *24*, 516-525.
  30. Caleyachetty, R.; Thomas, G.N.; Toulis, K.A.; Mohammed, N.; Gokhale, K.M.; Balachandran, K.; Nirantharakumar, K. Metabolically healthy obese and incident cardiovascular disease events among 3.5 million men and women. *Journal of the American College of Cardiology* **2017**, *70*, 1429-1437.
  31. Doustmohamadian, S.; Serahati, S.; Barzin, M.; Keihani, S.; Azizi, F.; Hosseinpanah, F. Risk of all-cause mortality in abdominal obesity phenotypes: Tehran lipid and glucose study. *Nutrition, Metabolism and Cardiovascular Diseases* **2017**, *27*, 241-248.
  32. Hansen, L.; Netterstrøm, M.K.; Johansen, N.B.; Rønn, P.F.; Vistisen, D.; Husemoen, L.L.N.; Jørgensen, M.E.; Rod, N.H.; Færch, K. Metabolically healthy obesity and ischemic heart disease: A 10-year follow-up of the inter99 study. *Journal of Clinical Endocrinology and Metabolism* **2017**, *102*, 1934-1942.
  33. Loprinzi, P.D.; Frith, E. Cardiometabolic healthy obesity paradigm and all-cause mortality risk. *European Journal of Internal Medicine* **2017**, *43*, 42-45.
  34. Mirzaei, B.; Abdi, H.; Serahati, S.; Barzin, M.; Niroomand, M.; Azizi, F.; Hosseinpanah, F. Cardiovascular risk in different obesity phenotypes over a decade follow-up: Tehran lipid and glucose study. *Atherosclerosis* **2017**, *258*, 65-71.
  35. Al-khalidi, B.; Kimball, S.M.; Kuk, J.L.; Arden, C.I. Metabolically healthy obesity, vitamin d, and all-cause and cardiometabolic mortality risk in nhanes iii. *Clinical Nutrition* **2018**.
  36. Eckel, N.; Li, Y.; Kuxhaus, O.; Stefan, N.; Hu, F.B.; Schulze, M.B. Transition from metabolic healthy to unhealthy phenotypes and association with cardiovascular disease risk across bmi categories in 90 257 women (the nurses' health study): 30 year follow-up from a prospective cohort study. *The Lancet Diabetes and Endocrinology* **2018**, *6*, 714-724.
  37. Kuk, J.L.; Rotondi, M.; Sui, X.; Blair, S.N.; Arden, C.I. Individuals with obesity but no other metabolic risk factors are not at significantly elevated all-cause mortality risk in men and women. *Clinical Obesity* **2018**, *8*, 305-312.

38. Lassale, C.; Tzoulaki, I.; Moons, K.G.M.; Sweeting, M.; Boer, J.; Johnson, L.; Huerta, J.M.; Agnoli, C.; Freisling, H.; Weiderpass, E., *et al.* Separate and combined associations of obesity and metabolic health with coronary heart disease: A pan-european case-cohort analysis. *European Heart Journal* **2018**, *39*, 397-406.
39. Lee, S.H.; Jeong, M.H.; Kim, J.H.; Kim, M.C.; Sim, D.S.; Hong, Y.J.; Ahn, Y.; Chae, S.C.; Seong, I.W.; Park, J.S., *et al.* Influence of obesity and metabolic syndrome on clinical outcomes of st-segment elevation myocardial infarction in men undergoing primary percutaneous coronary intervention. *Journal of Cardiology* **2018**, *72*, 328-334.
40. Li, L.; Chen, K.; Wang, A.P.; Gao, J.Q.; Zhao, K.; Wang, H.B.; Dou, J.T.; Lv, Z.H.; Wang, B.A.; Yan, W.H., *et al.* Cardiovascular disease outcomes in metabolically healthy obesity in communities of beijing cohort study. *International Journal of Clinical Practice* **2018**.
41. Xu, Y.; Li, H.; Wang, A.; Su, Z.; Yang, G.; Luo, Y.; Tao, L.; Chen, S.; Wu, S.; Wang, Y., *et al.* Association between the metabolically healthy obese phenotype and the risk of myocardial infarction: Results from the kailuan study. *Eur J Endocrinol* **2018**, *179*, 343-352.
42. Zhang, R.; Dong, S.Y.; Wang, W.M.; Fei, S.Y.; Xiang, H.; Zeng, Q. Obesity, metabolic abnormalities, and mortality in older men. *Journal of Geriatric Cardiology* **2018**, *15*, 422-427.
43. Rose, G. Incubation period of coronary heart disease. *Br. Med. J. (Clin. Res. Ed)* **1982**, *284*, 1600-1601.

#### Excluded studies with reasons (Cross-sectional studies)

1. Chen, X.; Gui, G.; Ji, W.; Xue, Q.; Wang, C.; Li, H. The relationship between obesity subtypes based on bmi and cardio-cerebrovascular disease. *Hypertens. Res.* **2019**.
2. Khawaja, K.I.; Mian, S.A.; Fatima, A.; Tahir, G.M.; Khan, F.F.; Burney, S.; Hasan, A.; Masud, F. Phenotypic and metabolic dichotomy in obesity: Clinical, biochemical and immunological correlates of metabolically divergent obese phenotypes in healthy south asian adults. *Singapore Med. J.* **2018**, *59*, 431-438.
3. Kwon, B.J.; Kim, D.W.; Her, S.H.; Kim, D.B.; Jang, S.W.; Cho, E.J.; Ihm, S.H.; Kim, H.Y.; Youn, H.J.; Seung, K.B., *et al.* Metabolically obese status with normal weight is associated with both the prevalence and severity of angiographic coronary artery disease. *Metabolism* **2013**, *62*, 952-960.
4. Blake, K.B.; Shankar, A.; Madhavan, S.; Ducatman, A. Associations among cardiometabolic risk factor clustering, weight status, and cardiovascular disease in an appalachian population. *J. Clin. Hypertens. (Greenwich)* **2010**, *12*, 964-972.

#### Excluded studies with reasons (focused on metabolically healthy overweight / metabolically healthy obesity)

1. Andersen, S.S.; Andersson, C.; Berger, S.M.; Jensen, T.B.; Torp-Pedersen, C.T.; Gislason, G.H.; Køber, L.; Schmiegelow, M.D. Impact of metabolic disorders

on the relation between overweight/obesity and incident myocardial infarction and ischaemic stroke in fertile women: A nationwide cohort study. *Clinical obesity* **2015**, *5*, 127-135.

#### Excluded studies with reasons (Not relevant to metabolically healthy obesity)

1. Horwich, T.B.; Fonarow, G.C.; Clark, A.L. Obesity and the obesity paradox in heart failure. *Prog. Cardiovasc. Dis.* **2018**, *61*, 151-156.
2. Boloukat, R.R.; Ramezankhani, A.; Hasheminia, M.; Tasdighi, E.; Azizi, F.; Hadaegh, F. Impact of blood pressure, cholesterol and glucose in the association between adiposity measures and coronary heart disease and stroke among iranian population. *Clin. Nutr.* **2018**, *37*, 2060-2067.
3. Kazempour-Ardebili, S.; Ramezankhani, A.; Eslami, A.; Akbarpour, S.; Azizi, F.; Hadaegh, F. Metabolic mediators of the impact of general and central adiposity measures on cardiovascular disease and mortality risks in older adults: Tehran lipid and glucose study. *Geriatrics and Gerontology International* **2017**, *17*, 2017-2024.
4. Hruby, S.A.; Bulathsinhala, L.; McKinnon, C.J.; Hill, O.T.; Montain, S.J.; Young, A.J.; Smith, T.J. Body mass index at accession and incident cardiometabolic risk factors in us army soldiers, 2001-2011. *PLoS One* **2017**, *12*.
5. Sung, K.C.; Ryu, S.; Lee, J.Y.; Lee, S.; Cheong, E.; Kim, J.Y.; Wild, S.H.; Byrne, C.D. All cause mortality and body mass index in a young asian occupational cohort without baseline metabolic syndrome components. *Int. J. Cardiol.* **2016**, *224*, 271-278.
6. Patsa, C.; Toutouzas, K.; Tsiamis, E.; Tsioufis, C.; Spanos, A.; Karanasos, A.; Michelongona, A.; Tousoulis, D.; Stefanadis, C. Impact of metabolic syndrome on clinical outcomes after new generation drug-eluting stent implantation: The 'obesity paradox' phenomenon is still apparent. *Nutrition, Metabolism and Cardiovascular Diseases* **2013**, *23*, 307-313.
7. Suadicani, P.; Ole Hein, H.; Von Eyben, F.E.; Gyntelberg, F. Metabolic and lifestyle predictors of ischemic heart disease and all-cause mortality among normal weight, overweight, and obese men: A 16-year follow-up in the copenhagen male study. *Metab. Syndr. Relat. Disord.* **2009**, *7*, 97-104.
8. Wienbergen, H.; Gitt, A.K.; Juenger, C.; Schiele, R.; Heer, T.; Towae, F.; Gohlke, H.; Senges, J. Impact of the body mass index on occurrence and outcome of acute st-elevation myocardial infarction. *Clin. Res. Cardiol.* **2008**, *97*, 83-88.
9. Conley, R.R.; Shim, J.C.; Kelly, D.L.; Feldman, S.; Yu, Y.; McMahon, R.P. Cardiovascular disease in relation to weight in deceased persons with schizophrenia. *Compr. Psychiatry* **2005**, *46*, 460-467.
10. Wessel, T.R.; Arant, C.B.; Olson, M.B.; Johnson, B.D.; Reis, S.E.; Sharaf, B.L.; Shaw, L.J.; Handberg, E.; Sopko, G.; Kelsey, S.F., *et al.* Relationship of physical fitness vs body mass index with coronary artery disease and cardiovascular events in women. *J. Am. Med. Assoc.* **2004**, *292*, 1179-1187.

#### Excluded studies with reasons (outcomes not interested of our study)



1. Feng, T.; Vegard, M.; Strand, L.B.; Laugsand, L.E.; Mørkedal, B.; Aune, D.; Vatten, L.; Ellekjær, H.; Loennechen, J.P.; Mukamal, K., *et al.* Metabolically healthy obesity and risk for atrial fibrillation: The hunt study. *Obesity* **2019**, *27*, 332-338.
2. Estrella, M.L.; Pirzada, A.; Durazo-Arvizu, R.A.; Cai, J.; Giachello, A.L.; Espinoza Gacinto, R.; Siega-Riz, A.M.; Daviglius, M.L. Correlates of and body composition measures associated with metabolically healthy obesity phenotype in hispanic/latino women and men: The hispanic community health study/study of latinos (hchs/sol). *J. Obes.* **2019**, *2019*, 1251456.
3. Kowall, B.; Lehmann, N.; Mahabadi, A.A.; Moebus, S.; Erbel, R.; Jockel, K.H.; Stang, A. Associations of metabolically healthy obesity with prevalence and progression of coronary artery calcification: Results from the heinz nixdorf recall cohort study. *Nutr. Metab. Cardiovasc. Dis.* **2018**.
4. Gilardini, L.; Zambon, A.; Soranna, D.; Croci, M.; Invitti, C. Predictors of the transition from metabolically healthy obesity to unhealthy obesity. *Eating and Weight Disorders* **2018**, *23*, 739-744.
5. Chau, K.; Girerd, N.; Magnusson, M.; Lamiral, Z.; Bozec, E.; Merckle, L.; Leosdottir, M.; Bachus, E.; Frikha, Z.; Ferreira, J.P., *et al.* Obesity and metabolic features associated with long-term developing diastolic dysfunction in an initially healthy population-based cohort. *Clin. Res. Cardiol.* **2018**, *107*, 887-896.
6. Bradshaw, P.T.; Reynolds, K.R.; Wagenknecht, L.E.; Ndumele, C.E.; Stevens, J. Incidence of components of metabolic syndrome in the metabolically healthy obese over 9 years follow-up: The atherosclerosis risk in communities study. *Int. J. Obes.* **2018**, *42*, 295-301.
7. Akinyemiju, T.; Moore, J.X.; Pisu, M.; Judd, S.E.; Goodman, M.; Shikany, J.M.; Howard, V.J.; Safford, M.; Gilchrist, S.C. A prospective study of obesity, metabolic health, and cancer mortality. *Obesity (19307381)* **2018**, *26*, 193-201.
8. Ahmad, M.I.; Li, Y.; Soliman, E.Z. Association of obesity phenotypes with electrocardiographic left ventricular hypertrophy in the general population. *J. Electrocardiol.* **2018**, *51*, 1125-1130.
9. Yoon, J.W.; Jung, C.H.; Kim, M.K.; Park, H.E.; Park, K.S.; Jang, H.C.; Moon, M.K.; Choi, S.Y.; Koo, B.K. Influence of the definition of "metabolically healthy obesity" on the progression of coronary artery calcification. *PLoS One* **2017**, *12*, e0178741.
10. Lee, H.; Choi, E.K.; Lee, S.H.; Han, K.D.; Rhee, T.M.; Park, C.S.; Lee, S.R.; Choe, W.S.; Lim, W.H.; Kang, S.H., *et al.* Atrial fibrillation risk in metabolically healthy obesity: A nationwide population-based study. *Int. J. Cardiol.* **2017**, *240*, 221-227.
11. Kim, T.J.; Shin, H.Y.; Chang, Y.; Kang, M.; Jee, J.; Choi, Y.H.; Ahn, H.S.; Ahn, S.H.; Son, H.J.; Ryu, S. Metabolically healthy obesity and the risk for subclinical atherosclerosis. *Atherosclerosis* **2017**, *262*, 191-197.
12. Jae, S.Y.; Babu, A.S.; Yoon, E.S.; Kurl, S.; Laukkanen, J.A.; Choi, Y.H.; Franklin, B.A. Impact of cardiorespiratory fitness and risk of systemic hypertension in nonobese versus obese men who are metabolically healthy or unhealthy. *Am. J. Cardiol.* **2017**, *120*, 765-768.
13. De Lorenzo, A.; Glerian, L.; Amaral, A.C.; Reis, T.B.; Lima, R.S.L. "Metabolically healthy" obesity: Prevalence, clinical features and association with

- myocardial ischaemia. *Obes. Res. Clin. Pract.* **2017**, *11*, 315-323.
14. Buscemi, S.; Chiarello, P.; Buscemi, C.; Corleo, D.; Massenti, M.F.; Barile, A.M.; Rosafio, G.; Maniaci, V.; Settapani, V.; Cosentino, L., *et al.* Characterization of metabolically healthy obese people and metabolically unhealthy normal-weight people in a general population cohort of the abcd study. *Journal of diabetes research* **2017**, *2017*, 9294038.
  15. Brant, L.C.; Wang, N.; Ojeda, F.M.; LaValley, M.; Barreto, S.M.; Benjamin, E.J.; Mitchell, G.F.; Vasan, R.S.; Palmisano, J.N.; Munzel, T., *et al.* Relations of metabolically healthy and unhealthy obesity to digital vascular function in three community-based cohorts: A meta-analysis. *Journal of the American Heart Association* **2017**, *6*.
  16. Loenneke, J.P.; Loprinzi, P.D. Obesity is associated with insulin resistance but not skeletal muscle dysfunction or all-cause mortality. *Age* **2016**, *38*, 1-7.
  17. Kang, Y.M.; Jung, C.H.; Jang, J.E.; Hwang, J.Y.; Kim, E.H.; Park, J.Y.; Kim, H.K.; Lee, W.J. The association of incident hypertension with metabolic health and obesity status: Definition of metabolic health does not matter. *Clin. Endocrinol. (Oxf.)* **2016**, *85*, 207-215.
  18. Dobson, R.; Burgess, M.I.; Sprung, V.S.; Irwin, A.; Hamer, M.; Jones, J.; Daousi, C.; Adams, V.; Kemp, G.J.; Shojaee-Moradie, F., *et al.* Metabolically healthy and unhealthy obesity: Differential effects on myocardial function according to metabolic syndrome, rather than obesity. *Int. J. Obes.* **2016**, *40*, 153-161.
  19. Nyström, P.K.; Carlsson, A.C.; Leander, K.; De Faire, U.; Hellenius, M.L.; Gigante, B. Obesity, metabolic syndrome and risk of atrial fibrillation: A swedish, prospective cohort study. *PLoS One* **2015**, *10*.
  20. Kim, S.; Kyung, C.; Park, J.S.; Lee, S.P.; Kim, H.K.; Ahn, C.W.; Kim, K.R.; Kang, S. Normal-weight obesity is associated with increased risk of subclinical atherosclerosis. *Cardiovasc. Diabetol.* **2015**, *14*.
  21. Hashimoto, Y.; Tanaka, M.; Okada, H.; Senmaru, T.; Hamaguchi, M.; Asano, M.; Yamazaki, M.; Oda, Y.; Hasegawa, G.; Toda, H., *et al.* Metabolically healthy obesity and risk of incident ckd. *Clin. J. Am. Soc. Nephrol.* **2015**, *10*, 578-583.
  22. Eckel, N.; Mühlenbruch, K.; Meidtner, K.; Boeing, H.; Stefan, N.; Schulze, M.B. Characterization of metabolically unhealthy normal-weight individuals: Risk factors and their associations with type 2 diabetes. *Metabolism* **2015**, *64*, 862-871.
  23. Benziger, C.P.; Bernabé-Ortiz, A.; Gilman, R.H.; Checkley, W.; Smeeth, L.; Málaga, G.; Miranda, J.J.; Casas, J.P.; Smith, G.D.; Ebrahim, S., *et al.* Metabolic abnormalities are common among south american hispanics subjects with normal weight or excess body weight: The cronicas cohort study. *PLoS One* **2015**, *10*.
  24. Benckert, M.; Lilja, M.; Söderberg, S.; Eliasson, M. Improved metabolic health among the obese in six population surveys 1986 to 2009: The northern sweden monica study. *BMC obesity* **2015**, *2*.
  25. Achilike, I.; Hazuda, H.P.; Fowler, S.P.; Aung, K.; Lorenzo, C. Predicting the development of the metabolically healthy obese phenotype. *Int. J. Obes.*

2015, 39, 228-234.

26. Hosseinpanah, F.; Barzin, M.; Amiri, P.; Azizi, F. The trends of metabolic syndrome in normal-weight tehranian adults. *Ann. Nutr. Metab.* **2011**, *58*, 126-132.

Excluded studies with reasons (Not comparing metabolically healthy obesity with metabolically healthy normal weight)

1. Park, Y.M.M.; Choi, M.K.; Lee, S.S.; Shivappa, N.; Han, K.; Steck, S.E.; Hébert, J.R.; Merchant, A.T.; Sandler, D.P. Dietary inflammatory potential and risk of mortality in metabolically healthy and unhealthy phenotypes among overweight and obese adults. *Clin. Nutr.* **2019**, *38*, 682-688.
2. Li, H.; He, D.; Zheng, D.; Amsalu, E.; Wang, A.; Tao, L.; Guo, J.; Li, X.; Wang, W.; Guo, X. Metabolically healthy obese phenotype and risk of cardiovascular disease: Results from the china health and retirement longitudinal study. *Arch. Gerontol. Geriatr.* **2019**, *82*, 1-7.
3. Li, H.; He, D.; Zheng, D.; Amsalu, E.; Wang, A.; Tao, L.; Guo, J.; Li, X.; Wang, W.; Guo, X. Metabolically healthy obese phenotype and risk of cardiovascular disease: Results from the china health and retirement longitudinal study. *Arch. Gerontol. Geriatr.* **2019**, *82*, 1-7.
4. Kouvari, M.; Panagiotakos, D.B.; Yannakoulia, M.; Georgousopoulou, E.; Critselis, E.; Chrysohoou, C.; Tousoulis, D.; Pitsavos, C. Transition from metabolically benign to metabolically unhealthy obesity and 10-year cardiovascular disease incidence: The attica cohort study. *Metabolism* **2019**, *93*, 18-24.
5. Echouffo-Tcheugui, J.B.; Short, M.I.; Xanthakis, V.; Field, P.; Sponholtz, T.R.; Larson, M.G.; Vasan, R.S. Natural history of obesity subphenotypes: Dynamic changes over two decades and prognosis in the framingham heart study. *The Journal of clinical endocrinology and metabolism* **2019**, *104*, 738-752.
6. Cho, Y.K.; Kang, Y.M.; Yoo, J.H.; Lee, J.; Park, J.Y.; Lee, W.J.; Kim, Y.J.; Jung, C.H. Implications of the dynamic nature of metabolic health status and obesity on risk of incident cardiovascular events and mortality: A nationwide population-based cohort study. *Metabolism* **2019**.
7. Mongraw-Chaffin, M.; Foster, M.C.; Anderson, C.A.M.; Burke, G.L.; Haq, N.; Kalyani, R.R.; Ouyang, P.; Sibley, C.T.; Tracy, R.; Woodward, M., *et al.* Metabolically healthy obesity, transition to metabolic syndrome, and cardiovascular risk. *J. Am. Coll. Cardiol.* **2018**, *71*, 1857-1865.
8. Lee, H.J.; Choi, E.K.; Lee, S.H.; Kim, Y.J.; Han, K.D.; Oh, S. Risk of ischemic stroke in metabolically healthy obesity: A nationwide population-based study. *PLoS One* **2018**, *13*, e0195210.
9. Johnson, W.; Bell, J.A.; Robson, E.; Norris, T.; Kivimäki, M.; Hamer, M. Do worse baseline risk factors explain the association of healthy obesity with increased mortality risk? Whitehall ii study. *Int. J. Obes.* **2018**.
10. Jae, S.Y.; Kurl, S.; Fernhall, B.; Kunutsor, S.K.; Franklin, B.A.; Laukkanen, J.A. Are metabolically healthy overweight/obese men at increased risk of sudden cardiac death? *Mayo Clin. Proc.* **2018**, *93*, 1266-1270.
11. Espinosa De Ycaza, A.E.; Donegan, D.; Jensen, M.D. Long-term metabolic risk for the metabolically healthy overweight/obese phenotype. *Int. J. Obes.*

**2018**, 42, 302-309.

12. Echouffo-Tcheugui, J.B.; Short, M.I.; Xanthakis, V.; Field, P.; Sponholtz, T.R.; Larson, M.G.; Vasan, R.S. Natural history of obesity subphenotypes: Dynamic changes over two decades and prognosis in the framingham heart study. *J. Clin. Endocrinol. Metab.* **2018**, N.PAG-N.PAG.
13. De Lorenzo, A.; Carazza, M.; Lima, R. All-cause mortality of metabolically healthy or unhealthy obese: Risk stratification using myocardial perfusion imaging. *Archives of medical sciences. Atherosclerotic diseases* **2018**, 3, e90-e95.
14. Sánchez-Iñigo, L.; Navarro-González, D.; Fernández-Montero, A.; Pastrana-Delgado, J.; Martínez, J.A. Risk of incident ischemic stroke according to the metabolic health and obesity states in the vascular-metabolic cun cohort. *Int. J. Stroke* **2017**, 12, 187-191.
15. Hulten, E.A.; Bittencourt, M.S.; Preston, R.; Singh, A.; Romagnoli, C.; Ghoshhajra, B.; Shah, R.; Abbasi, S.; Abbara, S.; Nasir, K., *et al.* Obesity, metabolic syndrome and cardiovascular prognosis: From the partners coronary computed tomography angiography registry. *Cardiovasc. Diabetol.* **2017**, 16, 14.
16. Hamer, M.; Johnson, W.; Bell, J.A. Improving risk estimates for metabolically healthy obesity and mortality using a refined healthy reference group. *European Journal of Endocrinology* **2017**, 177, 169-174.
17. Fujihara, K.; Matsubayashi, Y.; Yamamoto, M.; Osawa, T.; Ishizawa, M.; Kaneko, M.; Matsunaga, S.; Kato, K.; Seida, H.; Yamanaka, N., *et al.* Impact of body mass index and metabolic phenotypes on coronary artery disease according to glucose tolerance status. *Diabetes Metab.* **2017**, 43, 543-546.
18. Yang, H.K.; Han, K.; Kwon, H.S.; Park, Y.M.; Cho, J.H.; Yoon, K.H.; Kang, M.I.; Cha, B.Y.; Lee, S.H. Obesity, metabolic health, and mortality in adults: A nationwide population-based study in korea. *Sci. Rep.* **2016**, 6, 30329.
19. Park, Y.M.; Steck, S.E.; Fung, T.T.; Zhang, J.; Hazlett, L.J.; Han, K.; Merchant, A.T. Mediterranean diet and mortality risk in metabolically healthy obese and metabolically unhealthy obese phenotypes. *Int. J. Obes.* **2016**, 40, 1541-1549.
20. Mark Park, Y.M.; Fung, T.T.; Steck, S.E.; Zhang, J.; Hazlett, L.J.; Han, K.; Lee, S.H.; Merchant, A.T. Diet quality and mortality risk in metabolically obese normal-weight adults. *Mayo Clin. Proc.* **2016**, 91, 1372-1383.
21. Kim, N.H.; Seo, J.A.; Cho, H.; Seo, J.H.; Yu, J.H.; Yoo, H.J.; Kim, S.G.; Choi, K.M.; Baik, S.H.; Choi, D.S., *et al.* Risk of the development of diabetes and cardiovascular disease in metabolically healthy obese people. *Medicine (United States)* **2016**, 95.
22. Kaur, A.; Johnston, D.G.; Godsland, I.F. Does metabolic health in overweight and obesity persist? - individual variation and cardiovascular mortality over two decades. *European Journal of Endocrinology* **2016**, 175, 133-143.
23. Sung, K.C.; Ryu, S.; Cheong, E.S.; Kim, B.S.; Kim, B.J.; Kim, Y.B.; Chung, P.W.; Wild, S.H.; Byrne, C.D. All-cause and cardiovascular mortality among koreans: Effects of obesity and metabolic health. *Am. J. Prev. Med.* **2015**, 49, 62-71.
24. Panahi, M.H.; Yavari, P.; Khalili, D.; Mehrabi, Y.; Hadaegh, F.; Azizi, F. Obesity paradox: Incidence of coronary heart disease in patients with chronic kidney disease and metabolic syndrome. *Iranian Journal of Epidemiology* **2015**, 11, 72-81.

25. Luo, D.; Liu, F.; Li, X.; Yin, D.; Lin, Z.; Liu, H.; Hou, X.; Wang, C.; Jia, W. Comparison of the effect of 'metabolically healthy but obese' and 'metabolically abnormal but not obese' phenotypes on development of diabetes and cardiovascular disease in chinese. *Endocrine* **2015**, *49*, 130-138.
26. Keihani, S.; Hosseinpanah, F.; Barzin, M.; Serahati, S.; Doustmohamadian, S.; Azizi, F. Abdominal obesity phenotypes and risk of cardiovascular disease in a decade of follow-up: The tehran lipid and glucose study. *Atherosclerosis* **2015**, *238*, 256-263.
27. Hamer, M.; Stamatakis, E. Metabolically healthy obesity and risk of all-cause and cardiovascular disease mortality. *J. Clin. Endocrinol. Metab.* **2012**, *97*, 2482-2488.
28. Berstein, L.M. Dark and light side of obesity: Mortality of metabolically healthy obese people. *Expert Review of Endocrinology and Metabolism* **2012**, *7*, 629-632.
29. Berstein, L.M. Dark and light side of obesity: Mortality of metabolically healthy obese people. *Expert Rev. Endocrinol. Metab.* **2012**, *7*, 629-632.
30. Calori, G.; Lattuada, G.; Piemonti, L.; Garancini, M.P.; Ragona, F.; Villa, M.; Mannino, S.; Crosignani, P.; Bosi, E.; Luzi, L., *et al.* Prevalence, metabolic features, and prognosis of metabolically healthy obese italian individuals: The cremona study. *Diabetes Care* **2011**, *34*, 210-215.

**Table S1. Newcastle–Ottawa scale for assessment of quality of included cohort studies.**

| Study                       | Selection                                                                                  |                                                 |                                      |                                                                          | Comparability                              |                                   | Outcome                                      |                    |                                                                                                 | Total quality score |
|-----------------------------|--------------------------------------------------------------------------------------------|-------------------------------------------------|--------------------------------------|--------------------------------------------------------------------------|--------------------------------------------|-----------------------------------|----------------------------------------------|--------------------|-------------------------------------------------------------------------------------------------|---------------------|
| Quality assessment criteria | Representativeness of exposed cohort                                                       | Selection of non-exposed cohort                 | Ascertainment of exposure            | Demonstration that outcome of interest was not present at start of study | Adjust for the most important risk factors | Adjust for other risk factors     | Assessment of outcome                        | Follow-up length   | Loss to follow-up rate                                                                          |                     |
| Acceptable (★)              | Representative of general adult population in community (age/sex/being at risk of disease) | Drawn from the same community as exposed cohort | Secure records, Structured interview | Yes, or excluded when analysis                                           | Yes, at least for age and sex              | Yes, and smoking must be included | Independent blind assessment, record linkage | Follow-up >5 years | Follow-up completed, or small subjects lost (<20%), or lost subjects unlikely to introduce bias |                     |

|                              |   |   |   |   |   |   |   |   |   |   |
|------------------------------|---|---|---|---|---|---|---|---|---|---|
| Kip, et al 2004[1]           | ★ | ★ | ★ | ★ | ★ | - | - | - | - | 5 |
| Katzmarzyk, et al 2005[2]    | ★ | ★ | ★ | ★ | ★ | ★ | ★ | ★ | ★ | 9 |
| St-Pierre, et al 2005[3]     | ★ | ★ | ★ | ★ | ★ | ★ | ★ | ★ | ★ | 9 |
| Katzmarzyk, et al 2006[4]    | ★ | ★ | ★ | ★ | ★ | - | ★ | ★ | ★ | 8 |
| Meigs, et al 2006[5]         | ★ | ★ | ★ | ★ | ★ | ★ | ★ | ★ | ★ | 9 |
| Song, et al 2007[6]          | ★ | ★ | ★ | ★ | ★ | ★ | ★ | ★ | ★ | 9 |
| Kuk, et al 2009[7]           | ★ | ★ | - | - | ★ | ★ | ★ | ★ | - | 6 |
| Ärnlöv, et al 2010[8]        | ★ | ★ | ★ | ★ | ★ | ★ | ★ | ★ | ★ | 9 |
| Flint, et al 2010[9]         | ★ | ★ | - | ★ | ★ | ★ | ★ | ★ | - | 7 |
| Hosseinpanah, et al 2011[10] | ★ | ★ | ★ | ★ | ★ | ★ | ★ | ★ | ★ | 9 |
| Voulgari, et al 2011[11]     | ★ | ★ | ★ | ★ | ★ | ★ | ★ | ★ | ★ | 9 |
| Bo, et al 2012[12]           | ★ | ★ | ★ | - | ★ | ★ | ★ | ★ | ★ | 8 |
| Durward, et al 2012[13]      | ★ | ★ | ★ | - | ★ | ★ | ★ | ★ | ★ | 8 |
| Ogorodnikova, et al 2012[14] | ★ | ★ | ★ | ★ | ★ | ★ | ★ | ★ | - | 8 |
| Appleton, et al 2013[15]     | ★ | ★ | ★ | ★ | ★ | ★ | - | ★ | - | 7 |
| Choi, et al 2013[16]         | ★ | ★ | ★ | ★ | ★ | ★ | ★ | ★ | - | 8 |
| Hanks, et al 2013[17]        | ★ | ★ | ★ | ★ | ★ | ★ | ★ | ★ | - | 8 |
| Hinnouho, et al 2013[18]     | ★ | ★ | ★ | - | ★ | ★ | ★ | ★ | - | 7 |
| Ortega, et al 2013[19]       | ★ | ★ | ★ | ★ | ★ | ★ | ★ | ★ | - | 8 |
| Aung, et al 2014[20]         | ★ | ★ | ★ | ★ | ★ | ★ | ★ | ★ | ★ | 9 |
| Morkedal, et al 2014[21]     | ★ | ★ | ★ | ★ | ★ | ★ | ★ | ★ | - | 8 |
| Thomsen, et al 2014[22]      | ★ | ★ | ★ | ★ | ★ | ★ | ★ | - | - | 7 |
| van der, 2014[23]            | ★ | ★ | ★ | - | ★ | ★ | ★ | ★ | ★ | 8 |
| Hinnouho, et al 2015[24]     | ★ | ★ | ★ | ★ | ★ | ★ | ★ | ★ | ★ | 9 |
| Mirbolouk, et al 2015[25]    | ★ | ★ | ★ | - | ★ | ★ | ★ | ★ | ★ | 8 |
| Twig, et al 2015[26]         | ★ | ★ | ★ | ★ | ★ | ★ | ★ | ★ | - | 8 |

|                                |   |   |   |   |   |   |   |   |   |   |
|--------------------------------|---|---|---|---|---|---|---|---|---|---|
| Cheng, et al 2016[27]          | ★ | ★ | ★ | - | ★ | ★ | ★ | ★ | - | 7 |
| Dhana, et al 2016[28]          | ★ | ★ | ★ | ★ | ★ | ★ | ★ | ★ | - | 8 |
| Guo, et al 2016[29]            | ★ | ★ | ★ | ★ | ★ | ★ | ★ | ★ | - | 8 |
| Caleyachetty, et al 2017[30]   | ★ | ★ | ★ | ★ | ★ | ★ | ★ | ★ | - | 8 |
| Doustmohamadian et al 2017[31] | ★ | ★ | ★ | - | ★ | ★ | - | ★ | ★ | 7 |
| Hansen, et al 2017[32]         | ★ | ★ | ★ | ★ | ★ | ★ | ★ | ★ | - | 8 |
| Loprinzi, et al 2017[33]       | ★ | ★ | ★ | - | ★ | ★ | ★ | ★ | - | 7 |
| Mirzaei, et al 2017[34]        | ★ | ★ | ★ | ★ | ★ | ★ | ★ | ★ | ★ | 9 |
| Al-khalidi, et al 2018[35]     | ★ | ★ | ★ | ★ | ★ | ★ | ★ | ★ | ★ | 9 |
| Eckel, et al 2018[36]          | ★ | ★ | - | ★ | ★ | ★ | ★ | ★ | ★ | 8 |
| Kuk, et al 2018[37]            | ★ | ★ | ★ | ★ | ★ | ★ | ★ | ★ | ★ | 9 |
| Lassale, et al 2018[38]        | ★ | ★ | ★ | ★ | ★ | ★ | ★ | ★ | ★ | 9 |
| Lee, et al 2018[39]            | ★ | ★ | ★ | - | ★ | - | ★ | - | ★ | 6 |
| Li, et al 2018[40]             | ★ | ★ | ★ | ★ | ★ | ★ | - | - | - | 6 |
| Xu, et al 2018[41]             | ★ | ★ | ★ | ★ | ★ | ★ | ★ | ★ | ★ | 9 |
| Zhang, et al 2018[42]          | ★ | ★ | ★ | ★ | ★ | ★ | ★ | ★ | - | 8 |

Each star represents if individual criterion within the subsection was fulfilled. In terms of representativeness, articles were awarded one star if the subpopulation with MHO represented the average adult in community. In terms of selection, one star was given if the non-exposed cohort; i.e., MHNW individuals; was drawn from the same community as MHO. One star was given if MHO was identified from secured records or structured interviews, and one star was given if the outcome of interest was not presented at the start of study or was excluded from analysis. In terms of comparability, one star was given if the article adjusted for the most important risk factor, age and sex. Smoking is a well-known confounding factor of BMI, CVD and all-cause mortality; thus, one star was given if the article adjusted for smoking habits. In terms of outcomes, one star was given if the CVD and mortality outcomes were obtained from independent blind assessment or record linkage. One star was given if follow-up was continued for more than five years[43], which was considered sufficient time for the development of CVD. It was difficult to assess the dropout rate of secondary cohort studies, and so we gave articles one star if all participants completed follow-up, only a small number was lost (<20%) or if the loss of participants was unlikely to introduce bias. If the original cohort was specified and the follow-up process and final results were clearly presented, we concluded that the quality was good.



**Table S2. Characteristics of included cohort studies.**

| Study                     | Participants                                                       | Definition of obesity, BMI categories (kg/m <sup>2</sup> ) | Definition of metabolic healthy / unhealthy | Adjusted variables                                                                                       | Diagnostic criteria and main results presented by MHO/MHOW compared with MHNW with HR (95%CI)                                                                                                                                                                      | NO S |
|---------------------------|--------------------------------------------------------------------|------------------------------------------------------------|---------------------------------------------|----------------------------------------------------------------------------------------------------------|--------------------------------------------------------------------------------------------------------------------------------------------------------------------------------------------------------------------------------------------------------------------|------|
| Kip, et al 2004[1]        | US, WISE study, N=780, 100% women 9.6% MHO, 21-86 y/o, 3.5 yrs f/u | Measured; NW: <25; OW:25-29.9; OB: ≥30                     | ATP-III criteria                            | Age, race, prior MI, COPD, history of HF, number of lesions with ≥50% stenosis, PA                       | MACE (death, nonfatal MI, stroke, HF) by annual telephone or mail contact<br>All-cause mortality OW: 0.83(0.15; 4.63); OB: 0.66 (0.07; 6.01)<br>MACE OW: 0.76 (0.23, 2.56), OB: 0.74 (0.19; 2.84)                                                                  | 5    |
| Katzmarzyk, et al 2005[2] | US, ACLS, N=19,173, 0 % women, 5.3% MHO 43.1 y/o, 10.2 yrs f/u     | Measured; NW: 18.5- <25; OW:25-29.9; OB: ≥30               | ATP-III criteria                            | Age, year of examination, smoking, alcohol, possible existence of CVD, parental history of premature CVD | Deaths identified by Social Security Death Index, death certificates, National Death Index; CVD mortality cause ICD-9 390–449.9<br>CVD mortality: OW: 1.27 (0.83–1.94), OB: 2.70 (1.40; 5.19)<br>All-cause mortality: OW: 0.94 (0.75; 1.17); OB: 1.31 (0.86; 2.01) | 9    |
| St-Pierre, et al 2005[3]  | Canada, QCS, N=1,824, 0 % women, 24.5% MHO 34-64 y/o, 13 yrs f/u   | Measured; NW: <25; OB: ≥30                                 | TG, HDL-C, LDL, Apo B, IR, BP, hs-CRP       | Age, smoking, medication use                                                                             | First IHD included typical angina, coronary insufficiency (by standard FHS ECG criteria), nonfatal MI, coronary death<br>Fatal + non-fatal CHD incidence 1.53 (0.79; 3.00)                                                                                         | 9    |
| Katzmarzyk                | US, ACLS and                                                       | Measured;                                                  | ATP-III criteria, IDF                       | Age, year of                                                                                             | Deaths identified by death certificates,                                                                                                                                                                                                                           | 8    |

|                         |                                                                                   |                                                     |                                                                                                                                       |                                                                                                                                                                                                                                    |                                                                                                                                                                     |   |
|-------------------------|-----------------------------------------------------------------------------------|-----------------------------------------------------|---------------------------------------------------------------------------------------------------------------------------------------|------------------------------------------------------------------------------------------------------------------------------------------------------------------------------------------------------------------------------------|---------------------------------------------------------------------------------------------------------------------------------------------------------------------|---|
| , et al<br>2006[4]      | NHANES,<br>N=20,789,<br>0 % women,<br>18.4% MHO<br>43.3±9.7 y/o,<br>11.4 yrs f/u  | NW: <90cm;<br>OB:<br>>102cm                         |                                                                                                                                       | examination                                                                                                                                                                                                                        | National Death Index; CVD mortality<br>cause ICD-9 390–449.9<br>CVD mortality OR =1.40<br>All-cause mortality OR =1.26                                              |   |
| Meigs, et al<br>2006[5] | US, FOS,<br>N=2,902, 55%<br>women, 8.1%<br>MHO, 53 y/o,<br>11.4 yrs f/u           | Measured;<br>NW: <25;<br>OW:25-<br>29.9; OB:<br>≥30 | ATP-III criteria                                                                                                                      | Age, sex, smoking,<br>LDL-C                                                                                                                                                                                                        | By standard FHS ECG criteria<br>Fatal + non-fatal CVD incidence<br>OW: 1.30(0.89; 1.90), OB 1.48 (0.87;<br>2.55)                                                    | 9 |
|                         |                                                                                   |                                                     | MUH if HOMA-IR<br>(mole×μU/L <sup>2</sup> ) value<br>belongs to the top<br>quartile                                                   |                                                                                                                                                                                                                                    | Fatal + non-fatal CVD incidence<br>OW: 1.25(0.86; 1.81), OB: 1.42 (0.87;<br>2.33)                                                                                   |   |
| Song, et al<br>2007[6]  | US, WHS,<br>N=25,626,<br>100 % women,<br>11.4% MHO 39-<br>89 y/o,<br>10.2 yrs f/u | Measured;<br>NW: <25;<br>OW:25-<br>29.9; OB:<br>≥30 | Modified ATP-III<br>criteria (without WC)<br><br>MH if ≤2 criteria<br>(incident diabetes<br>during follow-up,<br>substituted for FBG) | Age, randomized<br>treatment assignment<br>(aspirin and vitamin<br>E), smoking,<br>exercise, alcohol,<br>total calorie intake,<br>postmenopausal<br>hormone use,<br>multivitamin use,<br>parental history of MI<br>before 60 years | Diagnoses confirmed by a committee of<br>cardiologists and one<br>Neurologist<br>Fatal + non-fatal CVD incidence<br>OW: 0.91 (0.70; 1.18); OB: 1.05 (0.66;<br>1.66] | 9 |

|                       |                                                                                           |                                                |                                                                                                                                                                                                                                                                     |                                                     |                                                                                                    |   |
|-----------------------|-------------------------------------------------------------------------------------------|------------------------------------------------|---------------------------------------------------------------------------------------------------------------------------------------------------------------------------------------------------------------------------------------------------------------------|-----------------------------------------------------|----------------------------------------------------------------------------------------------------|---|
| Kuk, et al<br>2009[7] | US, NHANES<br>III, N=6,011<br>1.3% MHO<br>52 % women in<br>MHO,<br>45 y/o,<br>8.7 yrs f/u | Self-<br>reported,<br>NW: 18.5-<br>25; OB: ≥30 | MUH if ≥1 criterion<br>of:<br>1) TG ≥1.69 mmol/l<br>or medications; 2)<br>BP≥130/85 mmHg,<br>or medications; 3)<br>glucose ≥ 5.6 mmol/l<br>or medications; 4)<br>HDL-C<1.04 mmol/l<br>(men), <1.29 mmol/l<br>(women); 5) HOMA-<br>IR ≥2.5 (mole×μU/L <sup>2</sup> ) | Age, sex, income,<br>ethnicity, smoking,<br>alcohol | Link to Public Access Mortality<br>All-cause mortality: OW: 0.45 (0.2; 1.2),<br>OB: 2.8 (1.2; 6.7) | 6 |
|                       |                                                                                           |                                                | MUH if HOMA-IR<br>≥2.5 (mole×μU/L <sup>2</sup> )<br>and ≥1 criteria of: 1)<br>TG ≥ 1.69 mmol/l or<br>medications; 2)<br>BP≥130/85 mmHg,<br>or medications; 3)<br>glucose ≥ 5.6 mmol/l<br>or medications, 4)<br>HDL-C<1.04 mmol/l<br>(men), <1.29 mmol/l<br>(women)  |                                                     | All-cause mortality OW: 0.91(0.5; 1.8),<br>OB: 2.58 (1.0; 6.7)                                     |   |

|                          |                                                                          |                                                                                                                   |                                                                                    |                                                                                                                                                                                                         |                                                                                                                                                                                                                                                                  |   |
|--------------------------|--------------------------------------------------------------------------|-------------------------------------------------------------------------------------------------------------------|------------------------------------------------------------------------------------|---------------------------------------------------------------------------------------------------------------------------------------------------------------------------------------------------------|------------------------------------------------------------------------------------------------------------------------------------------------------------------------------------------------------------------------------------------------------------------|---|
| Ärnlöv, et al<br>2010[8] | Sweden,<br>N=1,758,<br>0% women<br>1.7% MHO<br>50 y/o<br>30 yrs f/u      | Measured;<br>NW: <25;<br>OW:25-<br>29.9; OB:<br>≥30                                                               | Modified ATP-III<br>criteria (BMI ≥29.4<br>substituted for WC)                     | Age, smoking, LDL-C                                                                                                                                                                                     | Based on ICD-8, ICD-9, ICD-10<br>Fatal and hospitalized CVD incidence<br>OW: 1.52 (1.28; 1.80), OB: 1.95 (1.14;<br>3.34)<br>CV mortality: OW: 1.44 (1.14; 1.83), OB:<br>1.20 (0.49; 2.93)<br>All-cause mortality: OW: 1.21 (1.03;<br>1.40), OB: 1.65(1.03; 2.66) | 9 |
|                          |                                                                          |                                                                                                                   | MUH if HOMA-IR<br>>3.43(mole×μU/L <sup>2</sup> )<br>(based on the top<br>quartile) |                                                                                                                                                                                                         | Fatal and hospitalized CVD incidence:<br>OW: 1.44 (1.18; 1.77), OB: 1.91 (1.07-<br>3.41)<br>CV mortality: OW:1.36 (1.02; 1.80), OB:<br>1.80 (0.79; 4.08)<br>All-cause mortality: OW: 1.22 (1.02;<br>1.46), OB: 2.04 (1.25; 3.32)                                 |   |
| Flint, et al<br>2010[9]  | US, HPFS,<br>N=42,351, 0%<br>women, NA %<br>MHO, 53.6 y/o,<br>16 yrs f/u | Self-<br>reported;<br>NW:18.5-<br>22.9, high<br>NW: 23.0-<br>24.9; OW I:<br>25-26.9;<br>OW II: 27.0-<br>29.9; OB: | No<br>hypercholesterolemi<br>a, hypertension or<br>diabetes                        | For both sex: age,<br>family history of MI,<br>smoking, height,<br>marital status, intake<br>of alcohol, saturated<br>fat, polyunsaturated<br>fat, trans fat, folate,<br>vitamin E, and total<br>energy | CHD defined as MI, using WHO criteria<br>for MI; death ascertained by national<br>death index and by questionnaire<br>CHD<br>High NW: 1.07 (0.90; 1.26), OW I: 1.44<br>(1.22; 1.70), OW II: 1.76 (1.48; 2.10), OB:<br>1.95 (1.57; 2.42)                          | 7 |

|                            |                                                                                      |                                                    |                                                                                             |                                                                                                   |                                                                                                                                                                                                                                                  |   |
|----------------------------|--------------------------------------------------------------------------------------|----------------------------------------------------|---------------------------------------------------------------------------------------------|---------------------------------------------------------------------------------------------------|--------------------------------------------------------------------------------------------------------------------------------------------------------------------------------------------------------------------------------------------------|---|
|                            | US, NHS study, N=76,703, 100% women, NA % MHO, 53.9 y/o, 16 yrs f/u                  | ≥30                                                |                                                                                             | The above and HRT use                                                                             | CHD High NW: 1.08 (0.93; 1.26), OW I: 1.41 (1.21; 1.65), OW II: 1.54 (1.31; 1.81), OB, 2.14 (1.83; 2.50)                                                                                                                                         |   |
| Hosseinpah, et al 2011[10] | Iran, TLGS, N=6,215<br>56.9 % women<br>6.6 % MHO<br>44.6± 0.5y/o in MHO, 8.1 yrs f/u | Measured;<br>NW: 18.5-24.9; OW: 25.0-29.9; OB: ≥30 | IDF (cut-point WC ≥89 cm for men, ≥91 cm for women)                                         | Age, sex, exercise, smoking, family history of premature CHD, high TC                             | CVD defined as any CHD events (included MI, angiographically proved CHD, CHD death), stroke (a new neurological deficit lasted ≥24 h) or CVD death<br>Fatal + non-fatal CVD incidence: OW: 1.10 (0.76; 1.61), OB: 1.07 (0.59; 1.96)              | 9 |
| Voulgari, et al 2011[11]   | Greece, N= 550, 31 % MHO<br>53.2 % women in MHO, 60 y/o, 6 yrs f/u                   | Measured;<br>NW: <25; OW: 25.0-29.9; OB: ≥30       | ATP-III criteria                                                                            | Age, sex, IGT, dyslipidemia, HTN, smoking, physical inactivity, LVH, function on echocardiography | Identified by physician on the basis of symptoms, signs, prescription of medication and objective evidence of structural or functional heart disease by echography<br>Fatal + non-fatal HF incidence: OW: 1.12(0.35; 1.33); OB: 0.41 (0.1; 1.31) | 9 |
| Bo, et al 2012[12]         | Italy, N=1,658, 22 % MHO, 66.7% women in MHO, 45-64 y/o, 9 yrs f/u                   | Measured;<br>NW: <25; OW: 25.0-29.9; OB: ≥30       | MUH if HOMA-IR > 2.5 (mole×μU/L <sup>2</sup> ) (approximately upper quartile in the cohort) | Age, sex, smoking                                                                                 | CVD: Documented by family physician (angina, MI, CHD, TIA, stroke, gangrene, amputation, vascular surgery, HF); CV death by ICD 410–414, 430–438, 440, 390–459 and 798.1<br>CVD incidence: OW: 1.18 (0.56; 2.50),                                | 8 |

|                              |                                                                              |                                                 |                                                                                                                                                                                                   |                                                                                                                   |                                                                                                                                                                |   |
|------------------------------|------------------------------------------------------------------------------|-------------------------------------------------|---------------------------------------------------------------------------------------------------------------------------------------------------------------------------------------------------|-------------------------------------------------------------------------------------------------------------------|----------------------------------------------------------------------------------------------------------------------------------------------------------------|---|
|                              |                                                                              |                                                 |                                                                                                                                                                                                   |                                                                                                                   | OB: 2.76 (1.05; 7.28)<br>CVD mortality: OW: 1.52 (0.52; 2.52),<br>OB: 2.95 (1.03; 3.98)<br>All-cause mortality OW: 0.98 (0.41; 1.55),<br>OB: 1.57 (0.93; 2.21) |   |
| Durward, et al 2012[13]      | US, NHANES-III, N=4373, 49.4 % women, 3.4% MHO 37.1 ± 10.9 y/o, 14.7 yrs f/u | Measured; NW: 18.5-24.9; OW: 25.0-29.9; OB: ≥30 | HOMA-IR ≥2.5 (mole×μU/L <sup>2</sup> )                                                                                                                                                            | Sex, age, income, education, race/ethnicity, smoking, alcohol, marital status, leisure time PA, menopausal status | Linked to mortality files                                                                                                                                      | 8 |
|                              |                                                                              |                                                 | ATP-III criteria                                                                                                                                                                                  |                                                                                                                   | All-cause mortality: OB: 1.42 (0.6; 3.2)                                                                                                                       |   |
|                              |                                                                              |                                                 | MUH:>2 of: 1) HOMA-IR (mole×μU/L <sup>2</sup> ) <1.95 or medications; 2) TG≥1.7 mmol/L; 3) HDL-C <1.04 mmol/L (men), <1.30 mmol/L (women); 4) LDL-C ≥2.6 mmol/L; 5) TC ≥5.2 mmol/L or medications |                                                                                                                   | All-cause mortality: OB: 1.54 (0.7; 3.3)<br>All-cause mortality: OB: 1.48 (0.5; 4.2)                                                                           |   |
| Ogorodnikova, et al 2012[14] | US, ARIC/CHS study, N=17,544, 67.8% women in MHO, 55.5 y/o, 11.8 yrs f/u     | Measured; NW: 18.5-24.9; OW: 25.0-29.9; OB: ≥30 | ATP-III criteria without WC criterion)                                                                                                                                                            | Age, sex, race, smoking, alcohol                                                                                  | Review of death certificates and hospital discharge records                                                                                                    | 8 |
|                              |                                                                              |                                                 | Expanded ATP-III criteria, MHO = 4.5%                                                                                                                                                             |                                                                                                                   | Fatal + non-fatal CVD (CHD and stroke) incidence: OB: 1.24 (0.99; 1.57)                                                                                        |   |
|                              |                                                                              |                                                 | MUH if HOMA-IR (mole×μU/L <sup>2</sup> ) value                                                                                                                                                    |                                                                                                                   |                                                                                                                                                                |   |

|                          |                                                                                         |                                              |                                                                                                                          |                                                                                                                           |                                                                                                                                                                                     |   |
|--------------------------|-----------------------------------------------------------------------------------------|----------------------------------------------|--------------------------------------------------------------------------------------------------------------------------|---------------------------------------------------------------------------------------------------------------------------|-------------------------------------------------------------------------------------------------------------------------------------------------------------------------------------|---|
|                          |                                                                                         |                                              | belongs to the top quartile, MHO = 5.0%                                                                                  |                                                                                                                           |                                                                                                                                                                                     |   |
| Appleton, et al 2013[15] | Australia, NWAHS, N=3,743, 12.1% MHO, 14.4 % women in MHO, ≥18 y/o, 8.2 yrs f/u         | Measured; NW: 18.5-24.9; OW:25-29.9; OB: ≥30 | IDF (without WC) criteria                                                                                                | Age, sex, smoking, household income, education, PA, LDL-C                                                                 | Self-reported data<br>Non-fatal CVD incidence:<br>OW:1.17(0.68:2.02); OB:1.16 (0.58; 2.29)                                                                                          | 7 |
| Choi, et al 2013[16]     | Korea, SWS study, N=2,317, 9.7% MHO, 77.9 % women, 69.8 ± 5.6 y/o, 10.3(median) yrs f/u | Measured; NW: <23; OW:23-25; OB: ≥25         | Modified ATP-III criteria (without WC criterion; using 2 hPG≥7. 8 mmol/l or treatment for DM instead of FBG≥5. 6 mmol/l) | Age, sex, smoking, alcohol, presence of DM, HTN, CVD                                                                      | Death certificate data from Korean National Statistical Office<br>CV death by ICD-10 I00-I79<br><br>Compared to MHOW, MHO CVD 1.78(0.94; 3.4), all-cause mortality 1.18(0.84; 1.68) | 8 |
| Hanks, et al 2013[17]    | US, REGARDS study, N=4374 with CKD, 53 % women, 9.7% MHO 69±10 y/o, 4.5 yrs f/u         | Measured; NW: 18.5-24.9; OW:25-29.9; OB: ≥30 | JIS criteria                                                                                                             | Age, sex, region, PA, smoking, history of CHD/stroke, education, family income, urinary albumin to creatinine ratio, eGFR | Linked to Social Security Death Index, death certificates, National Death Index<br><br>All-cause mortality: OW:0.74(0.57-0.96); OB: 0.78 (0.55; 1.10)                               | 8 |

|                             |                                                                                                   |                                              |                                                                                                                                                                |                                                                                                             |                                                                                                                                                                                                                                                                                              |   |
|-----------------------------|---------------------------------------------------------------------------------------------------|----------------------------------------------|----------------------------------------------------------------------------------------------------------------------------------------------------------------|-------------------------------------------------------------------------------------------------------------|----------------------------------------------------------------------------------------------------------------------------------------------------------------------------------------------------------------------------------------------------------------------------------------------|---|
| Hinnouho, et al<br>2013[18] | UK, Whitehall II cohort study, N=5,269, 28.3% women, 4.5% MHO, 41-63 y/o, 17.7 yrs f/u            | Measured; NW: 18.5-24.9; OW:25-29.9; OB: ≥30 | ATP-III criteria                                                                                                                                               | Age, sex, occupational grade, PA, smoking, alcohol, fruit, vegetable consumption, marital status, ethnicity | Defined by ICD-9 or ICD-10 codes<br>CVD mortality: OW:1.03(0.55-1.91);<br>OB:2.49 (1.05; 5.91)<br>All-cause mortality: OW:0.94(0.69-1.27);<br>OB:1.81 (1.16; 2.84)                                                                                                                           | 7 |
|                             |                                                                                                   |                                              | MUH if HOMA-IR (mole $\times$ $\mu$ U/L <sup>2</sup> ) >1.7 (men) or >1.52 (women) (based on quartiles)                                                        |                                                                                                             | CVD mortality: OW:1.16(0.74-1.80);<br>OB:1.04 (0.41; 2.66)<br>All-cause mortality: OW:0.96(0.77-1.24);<br>OB:1.08 (0.67; 1.74)                                                                                                                                                               |   |
| Ortega, et al 2013[19]      | US, ACLS, N= 43,265, 24.3 % women, 4.0% MHO 44.2 $\pm$ 9.9 y/o, 14.3(6.0-19.8) yrs f/u            | Measured; NW: <25; OW:25-29.9; OB: ≥30       | JIS criteria                                                                                                                                                   | Age, sex, examination year, smoking, alcohol consumption, parental history of CVD                           | CV mortality by ICD-9,10, non-fatal CVD by diagnosis of MI, stroke, or a coronary revascularization procedure ascertained from mail-back health surveys<br>Non-fatal CVD events: OB: 1.72 (1.33; 2.12)<br>CVD mortality: OB: 2.44 (1.90; 2.97)<br>All-cause mortality; OB: 1.54 (1.24; 1.84) | 8 |
| Aung, et al 2014[20]        | US, San Antonio Heart Study, N=3,700, 10.3% MHO 41.8 % women in MHO, 25-64 y/o, 7.4(6.3-10.3) yrs | Measured; NW: <25; OW:25-29.9; OB: ≥30       | MUO if >1 of the criteria: 1) TG $\geq$ 1.7 mmol/L; 2) BP $\geq$ 130/85 mmHg or medication; 3) FBG $\geq$ 5.6 mmol/L or medication; 4) HDL-C <1.04 (men); 1.29 | Age, sex, ethnic origin, smoking                                                                            | Self-reported MI, stroke, or coronary revascularization procedure or any CV death by ICD-9 390-459<br><br>Fatal + non-fatal CVD incidence: OW:2(1.0-4.1); OB:4.40 (2.0; 9.5)                                                                                                                 | 9 |



|                          |                                                                                                    |                                                                          |                                                                                                                       |                                                                                             |                                                                                                                                                                                                              |   |
|--------------------------|----------------------------------------------------------------------------------------------------|--------------------------------------------------------------------------|-----------------------------------------------------------------------------------------------------------------------|---------------------------------------------------------------------------------------------|--------------------------------------------------------------------------------------------------------------------------------------------------------------------------------------------------------------|---|
|                          | f/u                                                                                                |                                                                          | mmol/L (women) or medication; 5)<br>HOMA-IR<br>( $\text{mole} \times \mu\text{U/L}^2$ ) > 90 <sup>th</sup> percentile |                                                                                             |                                                                                                                                                                                                              |   |
| Morkedal, et al 2014[21] | Norway, HUNT study, N=61,299, 5.7% MHO, 68.9% women in MHO, ≥20 y/o, 12 yrs f/u                    | Measured; NW: <25; OW:25-29.9; OB: ≥30                                   | Modified IDF criteria (WC >94 cm for men, >80 for women or BMI > 30 and two of the other criteria)                    | Age, sex, smoking, time since last meal, education, marital status, PA, alcohol consumption | Diagnosed by cardiologists according to ESC/ACC consensus guideline<br>MI incidence: OW:1.3 (1.1-1.5); OB:1.10 (0.9; 1.4)<br>HF incidence: OW:1.0 (0.8-1.3); OB: 1.7 (1.3; 2.3)                              | 8 |
| Thomsen, et al 2014[22]  | Denmark, CGPS, N=71,529, 6.2% MHO, 68 % women in MHO, 20-100 y/o, 3.6 yrs f/u                      | Measured; NW: 18.5-24.9; OW:25-29.9; OB: ≥30                             | Modified JIS criteria (without WC; FBG substituted by non-FBG ≥200 mg/dL)<br>MH if <3 criteria                        | Age, sex, smoking, LDL-C, lipid-lowering medication, aspirin use, physical inactivity       | IHD based on ICD-8: 410-414, ICD-10: I20-I25<br>Fatal + non-fatal IHD incidence: OW: 1.08(0.95-1.24); OB:1.45 (1.20; 1.77)<br>Fatal + non-fatal MI incidence: OW: 1.26 (1.00-1.61); OB:1.88 (1.34; 2.63)     | 7 |
| van der, et al 2014[23]  | Netherlands, EPIC-MORGEN study, N=20299, 4.4% of MHO, 73.9 % women in MHO, 20-59 y/o, 13.4 yrs f/u | Measured; WC: Normal waist (<94 cm for men, <80 cm for women); Abdominal | MH if no metabolic risk factors: 1) BP ≥130/85 mmHg or medication; 2) TC ≥ 6.5mmol/L, or HDL-C <1.03 mmol/L (men),    | Age, sex, smoking, education, PA, total energy, protein, carbohydrate intake                | Vital status was obtained through linkage with the municipal administration registries<br><br>By WC: All-cause mortality OW:1.09(0.73-1.60); OB:1.66 (1.11; 2.49)<br>By BMI: All-cause mortality 1.63 (0.90; | 8 |

|                           |                                                                                 |                                                                                                                     |                                                                                                           |                                                                                                                                    |                                                                                                                                                                            |   |
|---------------------------|---------------------------------------------------------------------------------|---------------------------------------------------------------------------------------------------------------------|-----------------------------------------------------------------------------------------------------------|------------------------------------------------------------------------------------------------------------------------------------|----------------------------------------------------------------------------------------------------------------------------------------------------------------------------|---|
|                           |                                                                                 | OW (94-102cm for men; 80-88 cm for women); Abdominal OB ( $\geq$ 102cm for men, 88 cm for women) BMI : OB $\geq$ 30 | <1.29 mmol/L (women) or medication; 3) NFBG $\geq$ 7.8mmol/L or FBG $\geq$ 5.6 mmol/L or self-reported DM |                                                                                                                                    | 2.95)                                                                                                                                                                      |   |
| Hinnouho, et al 2015[24]  | UK, Whitehall II study, N=7,122, 3.9% MHO 30.3 % women, 39-63 y/o, 17.5 yrs f/u | Measured; NW: 18.5-24.9; OW:25-29.9; OB: $\geq$ 30                                                                  | ATP-III criteria (without WC), MH if $\leq$ 1 criterion                                                   | Sex, socioeconomic, marital status, ethnicity, PA, smoking, alcohol, fruits /vegetables consumption, CVD medication and procedures | CVD events included fatal CHD, by ICD-9: 410–414 or ICD-10: I20–25<br><br>Fatal + non-fatal CVD incidence:<br>OW:1.24(1.01-1.51); OB:1.95 (1.37; 2.77)                     | 9 |
| Mirbolouk, et al 2015[25] | Tehran, TLGS, N= 1199, 18.8% MHO 62.8 % women in MHO,                           | Measured; NW: 18.5-24.9; OW:25-29.9; OB:                                                                            | JIS criteria                                                                                              | Age, sex, smoking, TC and lipid lowering drugs.                                                                                    | CVD defined as any CHD events (included MI, angiographic proven CHD), stroke (a new neurological deficit lasted >24 h) or CVD death<br>CVD events: OW:1.21(0.77-1.91); OB: | 8 |

|                          |                                                                                                       |                                                                                                                      |                                                                                                                                                                                                     |                                                                                          |                                                                                                                                                                                                       |   |
|--------------------------|-------------------------------------------------------------------------------------------------------|----------------------------------------------------------------------------------------------------------------------|-----------------------------------------------------------------------------------------------------------------------------------------------------------------------------------------------------|------------------------------------------------------------------------------------------|-------------------------------------------------------------------------------------------------------------------------------------------------------------------------------------------------------|---|
|                          | ≥65 y/o,<br>9.7 yrs f/u                                                                               | ≥30                                                                                                                  |                                                                                                                                                                                                     |                                                                                          | 1.48 (0.65; 3.39)<br>CVD mortality: OW:2.07(0.89-4.81); OB:<br>1.11 (0.13; 9.04)<br>All-cause mortality: OW:1.38(0.87-2.19);<br>OB: 1.34 (0.51; 3.50)                                                 |   |
| Twig, et al<br>2015[26]  | Israel, MELANY<br>cohort, N=<br>31,684, 0 %<br>women, 1.9%<br>MHO, 31.2 ± 5.7<br>y/o, 6.1 yrs f/u     | Measured;<br>NW: 18.5-<br>24.9;<br>OW:25-<br>29.9; OB:<br>≥30                                                        | ATP-III criteria                                                                                                                                                                                    | Age, family history of<br>CAD, LDL-C, WBC<br>count, smoking<br>status, PA                | Based on diagnostic procedure treadmill<br>exercise test, ST segment depression,<br>symptoms of angina, coronary<br>angiography<br><br>CHD incidence: OW:1.86(0.77-4.49); OB:<br>5.08 (1.69; 11.24)   | 8 |
| Cheng, et al<br>2016[27] | US, GRAS<br>cohort, N=4551,<br>58.4 % women<br>5.0% MHO<br>74 ± 4.7 y/o,<br>10.9(0.3–14.4)<br>yrs f/u | Measured<br>Desirable:<br>18.5-24.9;<br>OW :25.0-<br>29.9; OB<br>class I:<br>30.0–34.9;<br>OB class<br>II/III: ≥35.0 | MH if ≤1 of these<br>criteria: 1) TG ≥1.69<br>mmol/L; 2) HDL<br><1.29 mmol/L<br>(women) or <1.03<br>mmol/L(men); 3)<br>BP≥130/85 mmHg or<br>HTN diagnosis; 4)<br>FBG≥5.56 mmol/L or<br>DM diagnosis | Age, sex, smoking,<br>alcohol,<br>hypercholesterolemia<br>drug, LDL-C, disease<br>burden | Deaths identified by medical records and<br>Social Security Death Index data<br><br>All-cause mortality<br>OW: 0.90(0.73-1.13)<br>OB class I: 0.58 (0.42; 0.80)<br>OB class II/III: 0.78 (0.48; 1.27) | 7 |
| Dhana, et al<br>2016[28] | Netherlands,<br>Rotterdam<br>Study, N=5314,<br>0% MHO                                                 | Measured<br>NW:18.5-<br>25; OW 25–<br>29.9; OB:                                                                      | JIS criteria                                                                                                                                                                                        | Age, sex, smoking,<br>TC level, lipid-<br>lowering medication<br>use, GFR, alcohol,      | Fatal CHD events coded by the<br>definitions applied within the CHS and<br>ARIC study                                                                                                                 | 8 |

|                                  |                                                                                       |                                                         |                                                                                        |                                                                        |                                                                                                                                                                                                                                                                        |   |
|----------------------------------|---------------------------------------------------------------------------------------|---------------------------------------------------------|----------------------------------------------------------------------------------------|------------------------------------------------------------------------|------------------------------------------------------------------------------------------------------------------------------------------------------------------------------------------------------------------------------------------------------------------------|---|
|                                  | 60.3 % women, 68 y/o, 10.3 (8.1-11.7) yrs f/u                                         | ≥30                                                     |                                                                                        | education, PA                                                          | CVD: OW:1.08(0.89-1.32); OB:1.07(0.75; 1.53)                                                                                                                                                                                                                           |   |
| Guo, et al 2016[29]              | US, ARIC/ CARDIA study: N= 14,685, 54.4 % women, 1.8% MHO, 54.3 y/o, 18.7 yrs f/u     | Measured; NW: 18.5-24.9; OB: ≥30                        | Modified ATP-III criteria                                                              | Age (log transformed), sex, race, income, education, smoking, drinking | Review of death certificates and hospital discharge records<br><br>CHD: OB:1.09 (0.47; 1.70)<br>Mortality 1.03 (0.69; 1.37)                                                                                                                                            | 8 |
| Caleyachetty, et al 2017[30]     | UK, N=3495777, 14.8% MHO 41.6 % women in MHO, 42.6 ±13.8 y/o in MHO, 5.4 yrs f/u      | Record from database. NW: 18- <25; OW: 25- <30; OB: ≥30 | MH if none of the following criteria: DM, HTN or prescription of lipid-lowering agents | Age, sex, smoking, social deprivation                                  | According to the database CVD includes: CHD, angina, IHD, MI, stroke, TIA, HF, PAOD<br>CHD: OW:1.30(1.27;1.34); OB: 1.49(1.45; 1.54)<br>Stroke: OB:1.07(1.04; 1.11)<br>HF: OW:1.11(1.06;1.16); OB: 1.96(1.86; 2.06)<br>PAOD: OW:0.92(0.88-0.96); OB: 0.91 (0.86; 0.96) | 8 |
| Doustmohammadian, et al 2017[31] | Iran, TLGS study, N=8804, 54.8% women, 12.8% MHO, 47.7±12.6 y/o, 12(8.7-12.5) yrs f/u | Measured WC≥89 cm for men, WC≥91 cm for women           | JIS criteria<br>MH if ≤2 of the criteria                                               | Age, sex, smoking, education, PA                                       | Not mentioned<br>All-cause mortality 1.35(0.89; 2.03)                                                                                                                                                                                                                  | 7 |

|                          |                                                                                           |                                                          |                                                                                                                                                                            |                                                                       |                                                                                                                                                                                                                                                                             |   |
|--------------------------|-------------------------------------------------------------------------------------------|----------------------------------------------------------|----------------------------------------------------------------------------------------------------------------------------------------------------------------------------|-----------------------------------------------------------------------|-----------------------------------------------------------------------------------------------------------------------------------------------------------------------------------------------------------------------------------------------------------------------------|---|
| Hansen, et al 2017[32]   | Denmark, Inter99 study, N=6238, 51.1 % women, 2.8% MHO, 46.3 y/o in men, 10.6 yrs f/u     | Measured<br>NW:18.5-24.9;<br>OW:25-29.9; OB $\geq$ 30    | MH if none of the following criteria:<br>1)BP $\geq$ 140/90mmHg;<br>2) TG $\geq$ 1.7 mmol/L;<br>3) FBG $\geq$ 6.1 mmol/L;<br>4) HDL <1.0 mmol/L (men), <1.2 mmol/L (women) | Age, intervention, smoking, PA, diet, cohabitation, ethnicity         | IHD by ICD-10 codes and relevant procedures (CABG, coronary thromboendarterectomy, revascularization, embolectomy)<br><br>IHD: OW:1.5(0.8;3); OB: 1.8 (0.7; 4.8) for women, OW:1.1(0.5;2.4); OB: 3.1 (1.1; 8.2) for men                                                     | 8 |
| Loprinzi, et al 2017[33] | USA, NHANES, N=7579, 51% women, 3.9% MHO, 45.9 y/o, 103 months f/u                        | Measured;<br>NW: 18.5-24.9; OW: 25.0–29.9; OB: $\geq$ 30 | ATP-III criteria                                                                                                                                                           | Age, sex, ethnicity, smoking, PA                                      | Deaths were identified by Social Security Death Index, death certificates, National Death Index<br>Non-CV mortality (CHD, HF or heart attack were excluded):<br>OW:2.30(1.37;3.85); OB: 2.59 (1.02; 6.56)<br>All-cause mortality: OW:1.88(1.08;3.28); OB: 2.41 (1.07; 5.46) | 7 |
| Mirzaei, et al 2017[34]  | Iran, TLGS, N=7842<br>55.2% women, 2.0% MHO<br>41.8 $\pm$ 9.3 y/o in MHO,<br>11.9 yrs f/u | Measured;<br>NW: 18.5-24.9; OW: 25.0-29.9; OB: $\geq$ 30 | JIS criteria                                                                                                                                                               | Age, sex, smoking, education, PA, family history of premature CHD, TC | CVD events: defined as any CHD, stroke (a new neurological deficit that lasted $\geq$ 24 h), or CVD death (fatal CHD or fatal stroke)<br>Incidence of CVD: OW:1.22(0.73;2.04); 1.74 (0.68; 4.44)                                                                            | 9 |
|                          |                                                                                           |                                                          | Insulin sensitive:<br>HOMA-IR < 2.6 (mole $\times$ $\mu$ U/L <sup>2</sup> ); Insulin                                                                                       |                                                                       | Incidence of CVD: OW:1.70(1.13;2.55); OB: 1.96(1.18; 3.24)                                                                                                                                                                                                                  |   |

|                            |                                                                                    |                                                        | resistant: HOMA-IR $\geq$ 2.6 (mole $\times$ $\mu$ U/L <sup>2</sup> )                                   |                                                                                                                                                                  |                                                                                                                                                                                                                                                                                                                        |   |
|----------------------------|------------------------------------------------------------------------------------|--------------------------------------------------------|---------------------------------------------------------------------------------------------------------|------------------------------------------------------------------------------------------------------------------------------------------------------------------|------------------------------------------------------------------------------------------------------------------------------------------------------------------------------------------------------------------------------------------------------------------------------------------------------------------------|---|
| Al-khalidi, et al 2018[35] | USA, NHANES III, N=11,333, 3.2% MHO, 100% women, 37.9 y/o in MHO, 19.6 yrs f/u     | Measured; NW: 18.5-24.9; OW: 25.0–29.9; OB: $\geq$ 30  | JIS criteria                                                                                            | Age, sex, ethnicity, smoking, educational, leisure-time PA, eGFR, serum CRP, 25(OH)D                                                                             | Cause of mortality by ICD-10; CM mortality defined by deaths classified as diseases of heart, cerebrovascular diseases, DM<br>CM mortality: OW:0.94(0.38;2.33); OB: 1.21(0.33; 4.46)<br>Non-CM mortality: OW:0.84(0.56; 1.27); OB: 0.84 (0.47; 1.50)<br>All-cause mortality: OW:0.85(0.59; 1.22); OB: 0.89(0.52; 1.51) | 9 |
| Eckel, et al 2018[36]      | USA, NHS, N=90257<br>6.4% MHO<br>100% women, 45.9 $\pm$ 7.0 y/o in MHO, 24 yrs f/u | Measured; NW: 18.5-24.9; OW: 25.0–29.9 ; OB: $\geq$ 30 | MH if none of the following criteria: self-reports of physician-diagnosed HTN, DM, hypercholesterolemia | Age, race, education, alcohol, smoking, post-menopausal status, HRT use, physical examinations for screening purposes, aspirin use, family history of MI, DM, PA | MI by WHO criteria: OW:1.13(0.92;1.37); OB: 1.44 (1.11; 1.86)<br>Stroke (CT or MRI showed a neurological deficit with sudden or rapid onset $\geq$ 24h): OW:1.29(1.05;1.58); OB: 1.37 (1.04; 1.81)<br>CVD (fatal and non-fatal MI + stroke : OW:1.20(1.04;1.39); OB:1.39(1.15; 1.68)                                   | 8 |
| Kuk, et al 2018[37]        | US, ACLS, N=54089, 1.2% MHO, 56.3 % women in MHO, 39.6 y/o in                      | Measured; NW: 18.5-<25; OW: 25.0–29.9; OB: $\geq$ 30   | ATP-III criteria                                                                                        | Age, sex, ethnicity, smoking, f/u time                                                                                                                           | Using mortality linkage data file<br><br>Mortality risk: OB: 1.15(1.01; 1.32)                                                                                                                                                                                                                                          | 9 |

|                         |                                                                                               |                                                 |                  |                                                                                              |                                                                                                                                                                                                                                                                                                   |   |
|-------------------------|-----------------------------------------------------------------------------------------------|-------------------------------------------------|------------------|----------------------------------------------------------------------------------------------|---------------------------------------------------------------------------------------------------------------------------------------------------------------------------------------------------------------------------------------------------------------------------------------------------|---|
|                         | MHO, 12.8 yrs f/u                                                                             |                                                 |                  |                                                                                              |                                                                                                                                                                                                                                                                                                   |   |
| Lassale, et al 2018[38] | Europe, EPIC-CVD study, N=520,000, 7.2% MHO, 64 % women in MHO, 52.8 yrs in MHO, 12.2 yrs f/u | Measured; NW: 18.5- <25; OW: 25.0-29.9; OB: ≥30 | IDF criteria     | Age, sex, center, education, smoking, diet, PA                                               | CHD (MI, IHD, angina pectoris) used self-report, linkage to care registers, admissions, and mortality data<br><br>CHD: OW:1.26(1.14;1.4); OB: 1.28 (1.03; 1.58)                                                                                                                                   | 9 |
| Lee, et al 2018[39]     | Korea, KAMIR-NIH, N=6935, 0% women, 18.7% MHO, 57.2±11.7 y/o in MHO, 1 yr f/u                 | Measured; NW:18.5-23 OB: ≥25                    | ATP III criteria | age, SBP, LVEF <40%, use of new P2Y12 inhibitors, statins, bare metal stents                 | MACE (death from any cause, MI, repeat PCI at target or non-target vessel revascularization, CABG) retrieved from hospital electronic medical records and/or by telephone interview.<br>All-cause mortality 0.89 (0.45; 1.76)<br>Cardiovascular death 1.28 (0.54; 3.02)<br>MACE 1.02 (0.75; 1.37) | 6 |
| Li, et al 2018[40]      | China, Beijing cohort study, N=9,393, 65.9% women, 6.7% MHO 56.5 ± 7.5 y/o, 3.2 yrs f/u       | Measured; NW: 18.5- <24; OW: 24.0–27.9; OB: ≥28 | ATP-III criteria | Sex, age, income, education, PA, smoking, drinking, ideal diet, family history of CVD, LDL-C | CVD (admission for MI, coronary revascularization, HF or stroke) using epidemiological questionnaire<br><br>CVD events: OW: 1.09(0.7;1.7); OB: 1.91(1.13; 3.24)                                                                                                                                   | 6 |

|                          |                                                                                   |                                                 |                                                                      |                                                                                        |                                                                                                                                                             |   |
|--------------------------|-----------------------------------------------------------------------------------|-------------------------------------------------|----------------------------------------------------------------------|----------------------------------------------------------------------------------------|-------------------------------------------------------------------------------------------------------------------------------------------------------------|---|
| Xu, et al<br>2018[41]    | China, Kailuan study, N=91,866, 7.3% MHO 19.9% women in MHO, 18-98 y/o, 8 yrs f/u | Measured; NW: 18.5- <24; OW: 24.0–27.9; OB: ≥28 | IDF criteria                                                         | Age, sex, education, income, smoking, drinking, PA, sodium intake, LDL-C, hs-CRP, eGFR | MI and death due to MI identified from medical records and death certificates<br><br>MI: OW: 1.08(0.89;1.31); OB: 1.76(1.37; 2.25)                          | 9 |
| Zhang, et al<br>2018[42] | China, N=3,485, 0% women, 7% MHO, >60 y/o, 5 yrs f/u                              | Measured; NW: <24; OW: 24.0–27.9; OB: ≥28       | MH if none of the following criteria: 1) HTN; 2) DM; 3) dyslipidemia | Age, smoking, HTN, DM, dyslipidemia                                                    | Mortality defined by ICD-10<br><br>All-cause mortality: OW:0.86(0.55;1.35); OB: 1.56 (0.85; 2.86)<br>CV mortality: OW:0.96(0.51;1.81); OB: 1.4 (0.56; 3.51) | 8 |

AbOW, Abdominal overweight; AbOB, Abdominal obesity; ACC, American College of Cardiology; ACLS, Aerobics Center Longitudinal Study; ADL, activities of daily living; Apo B, Apolipoprotein B; ARIC study, Atherosclerosis Risk in Communities study; BMI, body mass index; BP, blood pressure; CABG, coronary artery bypass graft; CARDIA study, Coronary Artery Risk Development in Young Adults Study; CES-D, The Center for Epidemiologic Studies Depression Scale; CGPS, Copenhagen General Population Study; CHS, Cardiovascular Health Study; CHD, coronary heart disease; CHRLS, China Health and Retirement Longitudinal Study; CI, confidence interval; CKD, chronic kidney disease; CM, cardiometabolic; COPD, chronic obstructive pulmonary disease; CRP, C-reactive protein; CVD, cardiovascular disease; CT, computed tomography; CTA, cardiac computed tomography angiography; DM, Diabetes mellitus; ECG, electrocardiogram; eGFR, estimated glomerular filtration rate; ELSA, English Longitudinal Study of Ageing; EPIC-CVD study, European Prospective Investigation into Cancer and Nutrition study; ESC, European Society of Cardiology; FBG, fasting blood glucose; FHS, Framingham Heart Study; FOS, Framingham Offspring Study; f/u, follow up; GRAS, Geisinger Rural Aging Study; h, hour; HDDRISC, The Heart Disease and Diabetes Risk Indicators in a Screened Cohort; HDL-C, high-density lipoprotein cholesterol; HF, heart failure; HOMA-IR, homeostasis model assessment-insulin resistance; HPFS, Health Professionals Follow-up Study; HR, hazard ratio; HRT, hormone replacement therapy; HSCIC, NHS Information Centre for Health and Social Care; hs-CRP, high sensitivity C-reactive protein; HSE, Health Survey for England; HTN, hypertension; IADL, Independent activities of daily living; ICD,



International Classification of Disease; IDF, International Diabetes Federation; IR, insulin resistance; IGT, impaired glucose tolerance; IHD, ischemic heart disease; JIS, Joint Interim Statement; JPHC study, Japan Public Health Center-based Prospective study; KIHDRF study, Kuopio Ischemic Heart Disease Risk Factor Study; KoGES, Korean Genome and Epidemiology Study; L, liter; LDL-C, low-density lipoprotein cholesterol; LVEF, left ventricular ejection fraction; LVH, left ventricular hypertrophy; MACE, Major adverse cardiovascular event; MELANY cohort, Metabolic, Lifestyle and Nutrition Assessment in Young Adult Cohort; MESA study, Multi-Ethnic Study of Atherosclerosis study; MetS, metabolic syndrome; MH, metabolically healthy; MHO, metabolically healthy overweight/obese; MI, myocardial infarction; MRI, magnetic resonance imaging; MUH, metabolically unhealthy; ATP III, National Cholesterol Education Program- Adult Treatment program III; MHNW, metabolically healthy normal weight; MHO, metabolically healthy obesity; MHOW, metabolically healthy overweight; MI, myocardial infarction; MUNW, metabolically unhealthy normal weight; MUO, metabolically unhealthy obesity; NA, not available; NHANES III, Third National Health and Nutrition Examination Survey; NHLBI, National Heart, Lung, and Blood Institute; NHS, Nurses' Health Study; NOS, Newcastle-Ottawa scale; NW, normal weight; NWAHS, North West Adelaide Health Study; OB, obese; OR, odds ratio; OW, overweight; PA, physical activity; PAOD, peripheral artery occlusion disease; PCI, percutaneous coronary intervention; QCS, Quebec Cardiovascular Study; REGARDS study, Reasons for Geographic and Racial Differences in Stroke study; SHS, Scottish Health Survey; SWS study, South-West Seoul Study; TC, total cholesterol; TG, triglycerides; TIA, transient ischemic attack; TLGS, Tehran Lipid and Glucose Study; UK, United Kingdom; US, United States; VF, ventricular fibrillation; VMCUN cohort, Vascular-Metabolic CUN cohort; VT, ventricular tachycardia; WBC, white blood cell; WC, waist circumference; WHO, world health organization; WHR, waist-to-hip ratio; WHS, Women's Health Study; WISE, Women's Ischemia Syndrome Evaluation; y/o, years old; yrs, years

**Figure S1 A Forest plot of cardiovascular disease, comparing participants with metabolically healthy obesity and participants with metabolically healthy normal weight, with a subgroup analysis by definitions of metabolic health**

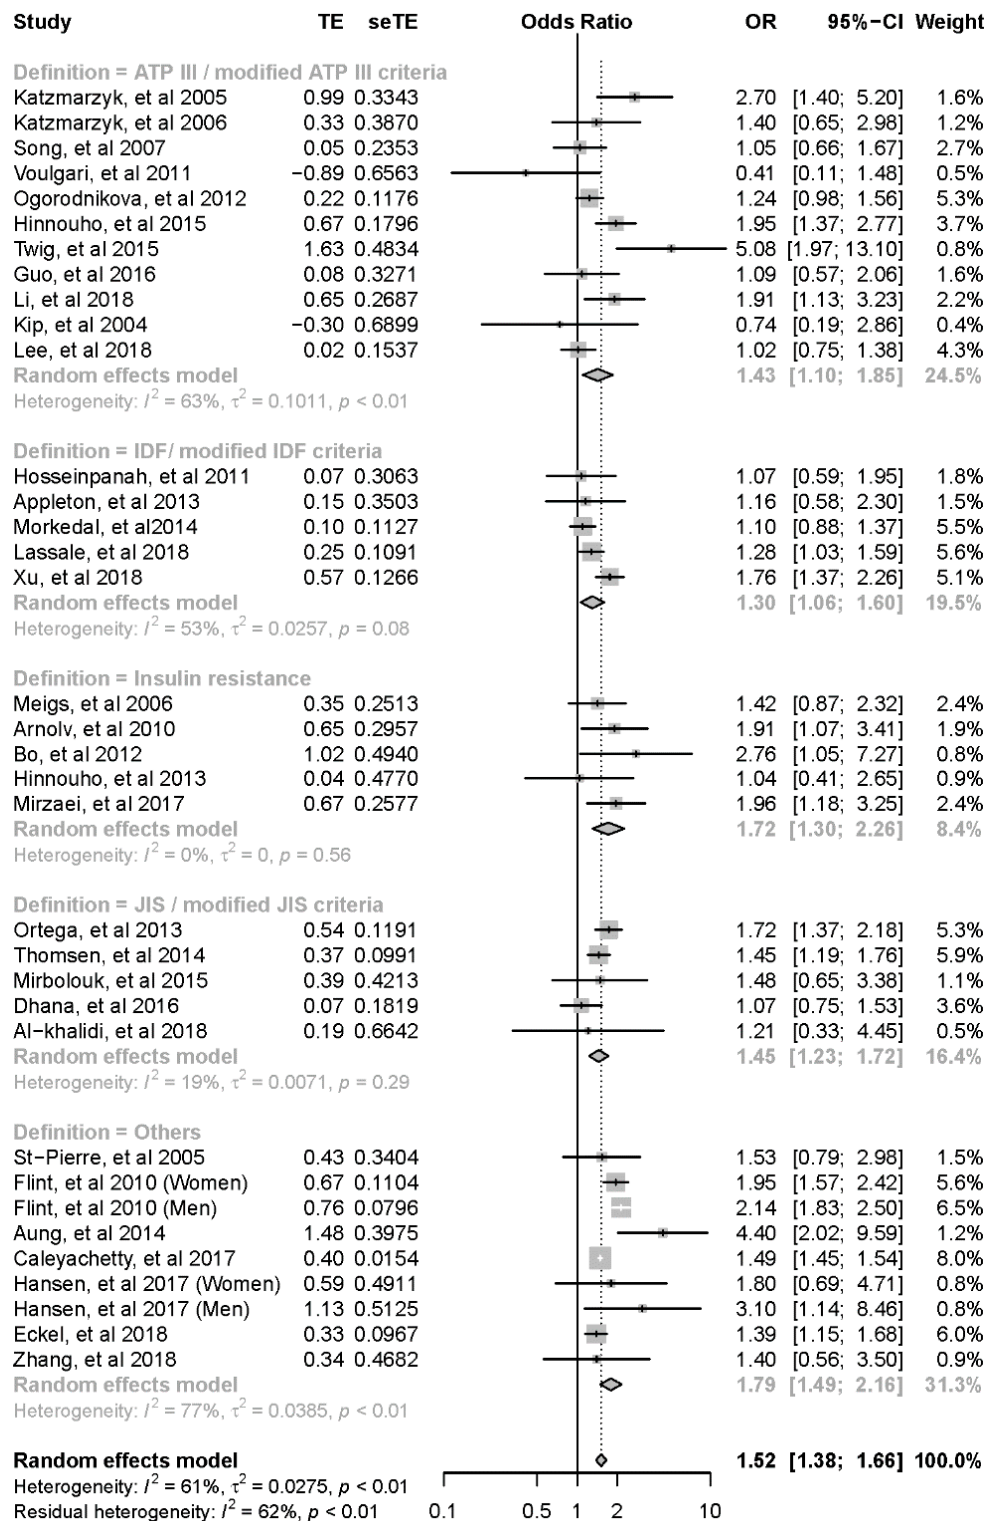

ATP III, Adult Treatment program III; CI, confidence interval; IDF, International Diabetes Federation; JIS, Joint Interim Statement; OR, odds ratio; SE, standard error; TE, treatment effect

**Figure S2. A Forest plot of cardiovascular disease, comparing participants with metabolically healthy obesity and participants with metabolically healthy normal weight, with a subgroup analysis by definitions of obesity.**

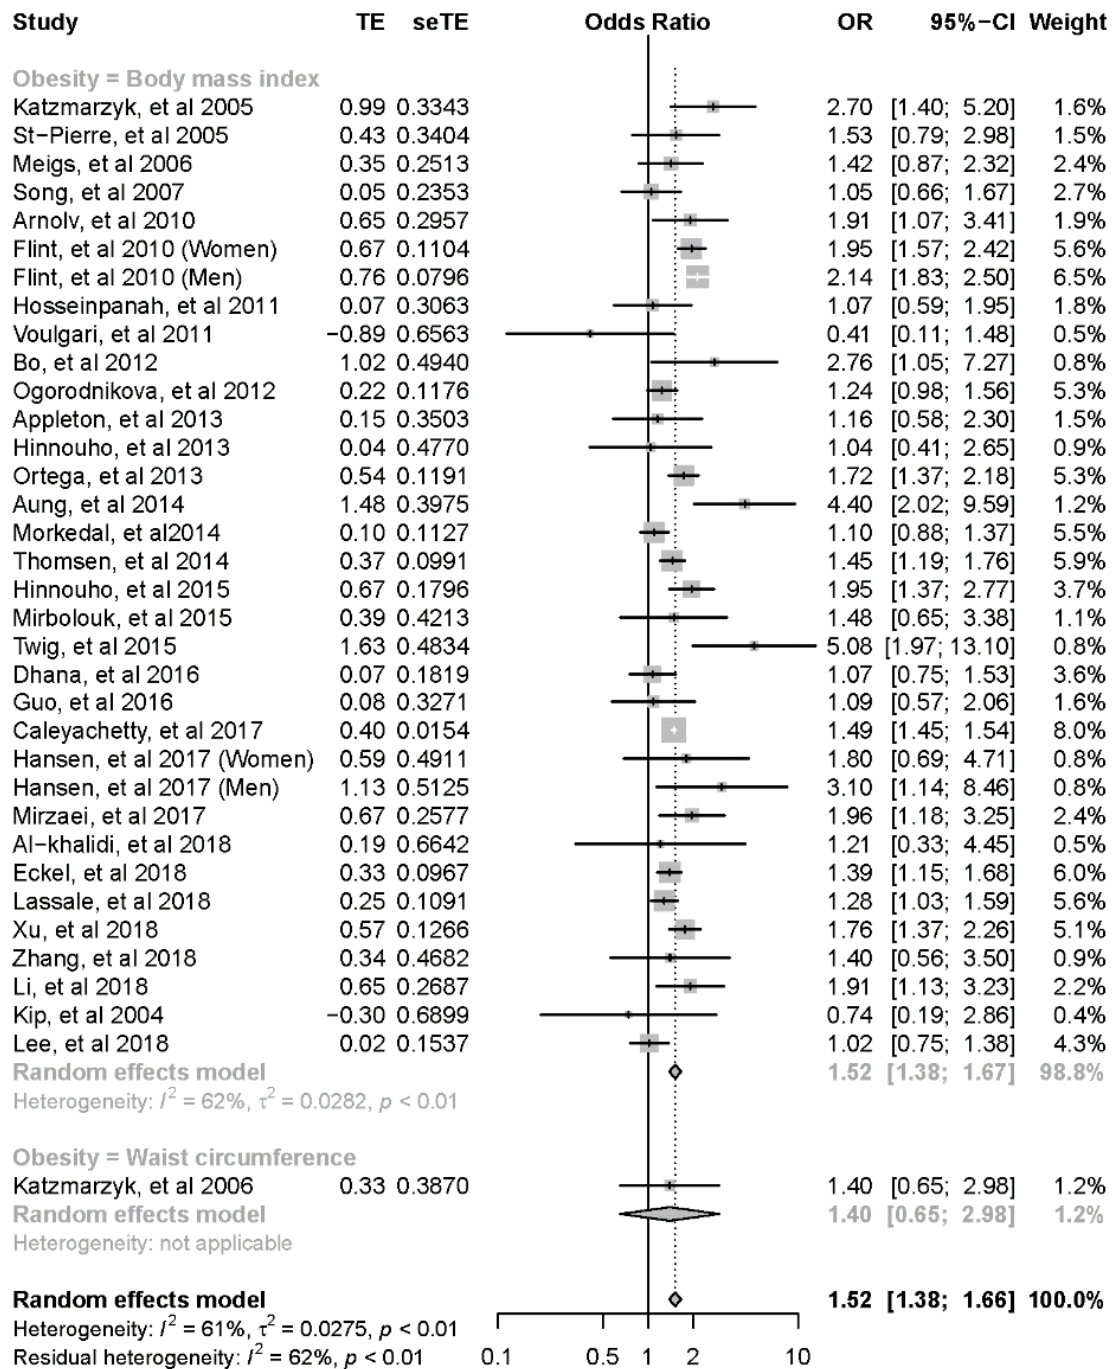

CI, confidence interval; OR, odds ratio; SE, standard error; TE, treatment effect

**Figure S3. A Forest plot of cardiovascular disease, comparing participants with metabolically healthy obesity and participants with metabolically healthy normal weight, with a subgroup analysis by different cardiovascular outcomes.**

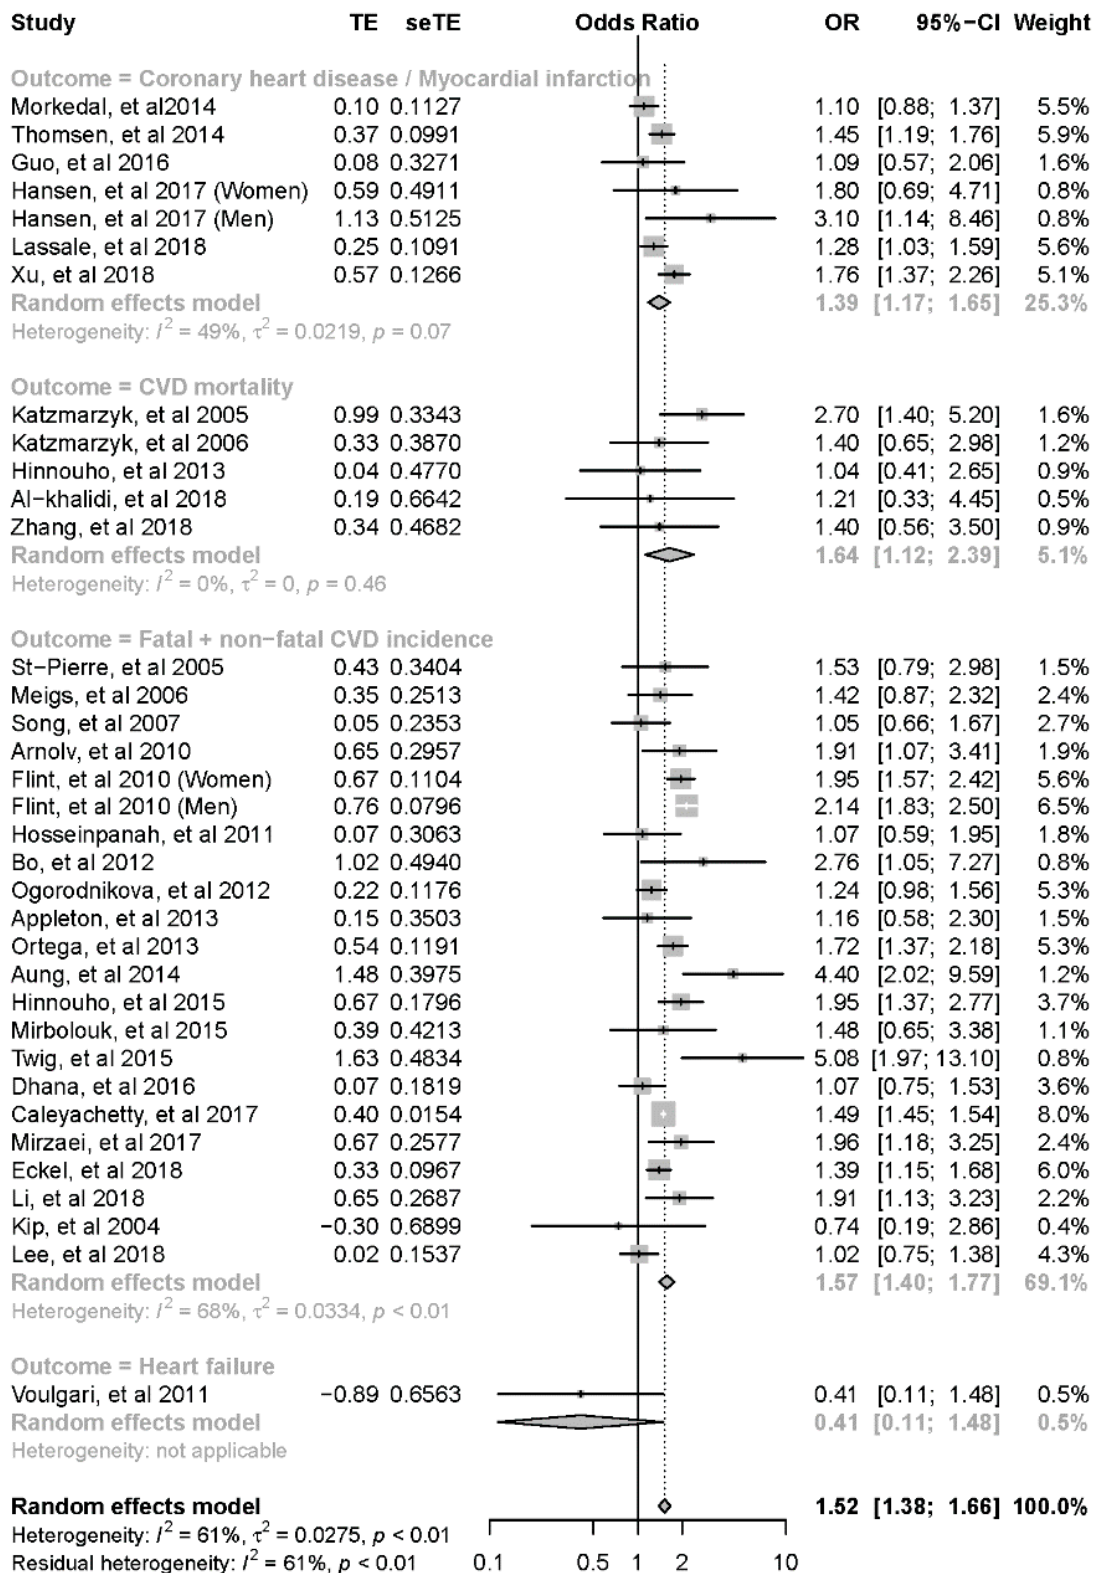

CI, confidence interval; CVD, cardiovascular disease; OR, odds ratio; SE, standard error; TE, treatment effect

**Figure S4. Meta-regression bubble plot of the correlation between log odds ratio of cardiovascular disease and age.**

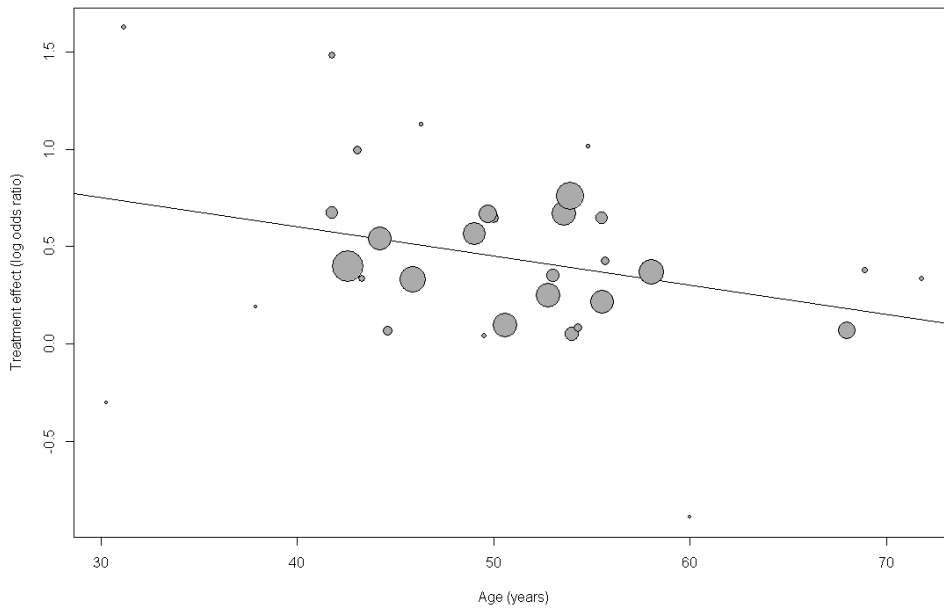

Each bubble represented a study and bubble size represented the sample size of the study. The regression line showed a borderline significant trend of declining risk with age increased.

**OR=0.99(0.97; 1.00),  $p=0.06$ ,  $R^2$  (%)=1.6%**

**Figure S5. Meta-regression bubble plot of the correlation between log odds ratio of cardiovascular disease and smoke.**

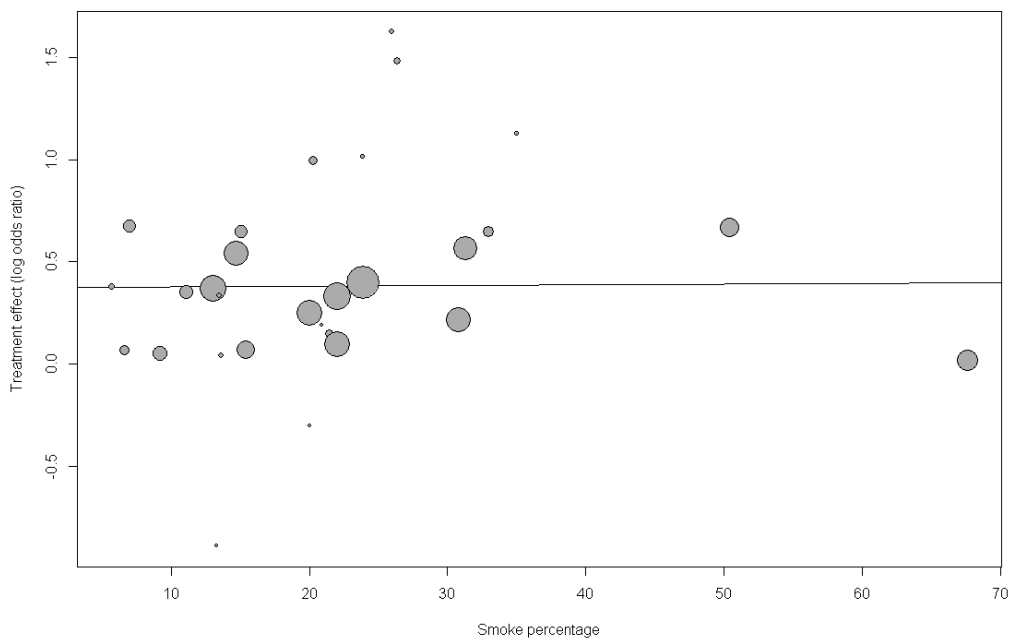

Each bubble represented a study and bubble size represented the sample size of the study. The regression line showed a non-significant trend of increased risk with smoke proportion increased.

**OR = 1.00(0.99; 1.01),  $p=0.94$ ,  $R^2$  (%)=0%**

**Figure S6. Meta-regression bubble plot of the correlation between log odds ratio of cardiovascular disease and follow-up duration.**

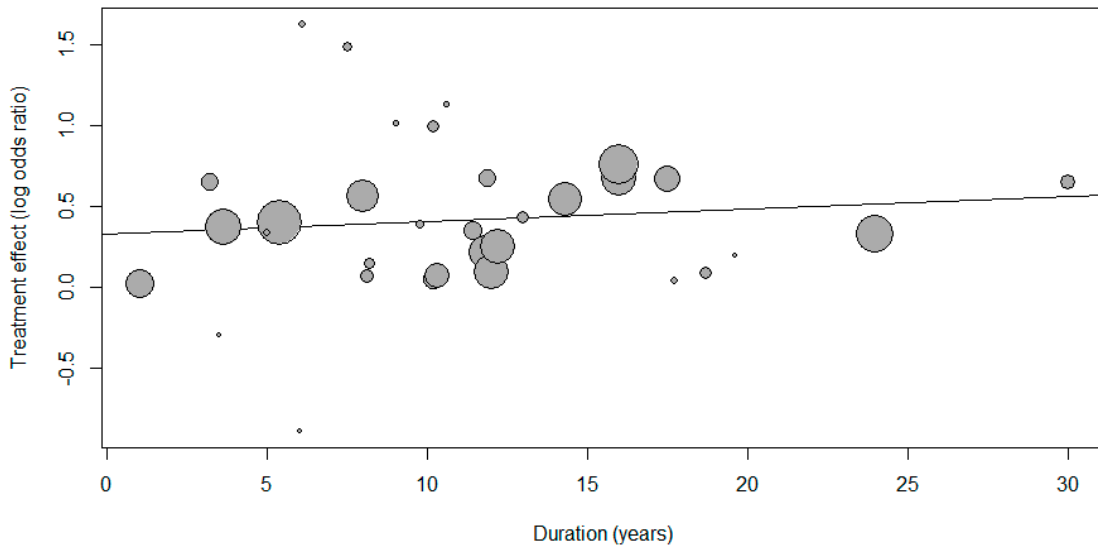

Each bubble represented a study and bubble size represented the sample size of the study. The regression line showed a non-significant trend of increased risk with follow-up year increased.  
OR = 1.01(0.99; 1.03),  $p=0.43$ ,  $R^2$  (%)=2.2%

**Figure S7. The funnel plot standard error and odds ratio of cardiovascular disease showing study dispersion.**

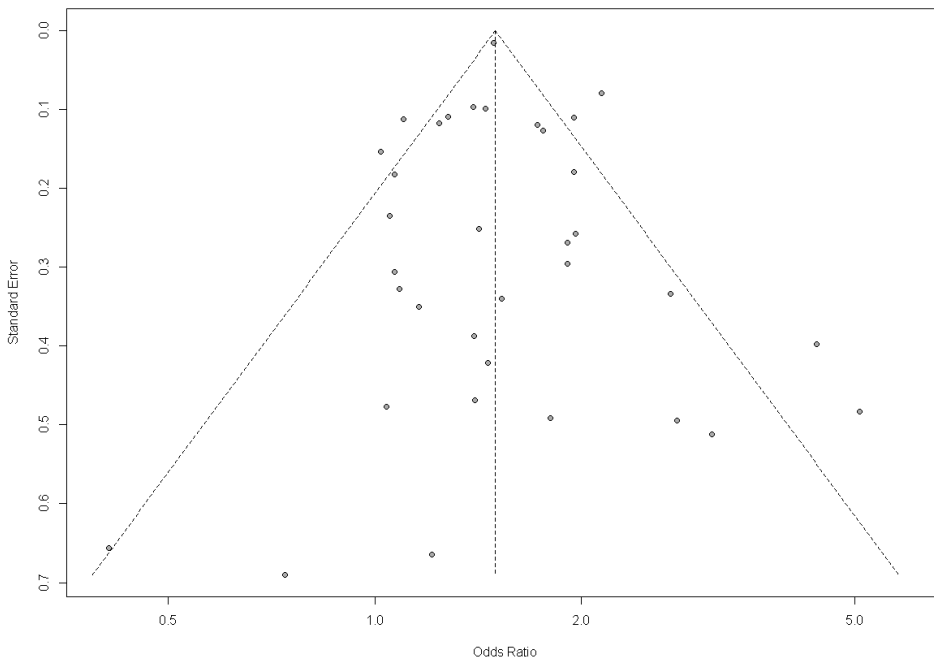

Egger test, slope=0.40,  $p = 0.73$

**Table S3. Sensitivity analyses of people with metabolically healthy obesity and risk of cardiovascular disease and all-cause mortality.**

|                                                                         | Risk of cardiovascular disease |                           |                    | All-cause mortality     |                           |                    |
|-------------------------------------------------------------------------|--------------------------------|---------------------------|--------------------|-------------------------|---------------------------|--------------------|
|                                                                         | OR (95% CI)                    | <i>I</i> <sup>2</sup> (%) | Numbers of studies | OR (95% CI)             | <i>I</i> <sup>2</sup> (%) | Numbers of studies |
| <b>Overall</b>                                                          | <b>1.52(1.38; 1.66)</b>        | 61                        | 35                 | <b>1.23(1.05; 1.43)</b> | 62                        | 20                 |
| <b>Articles with Newcastle-Ottawa Scale equal or high than 7 points</b> | <b>1.54 (1.40; 1.69)</b>       | 61                        | 32                 | <b>1.23(1.04; 1.44)</b> | 66                        | 17                 |
| <b>CVD without CV mortality</b>                                         | <b>1.51 (1.37; 1.66)</b>       | 65                        | 30                 |                         |                           |                    |

**Figure S8. Sensitivity analyses of metabolically healthy obesity and risk of cardiovascular disease by omitting each study.**

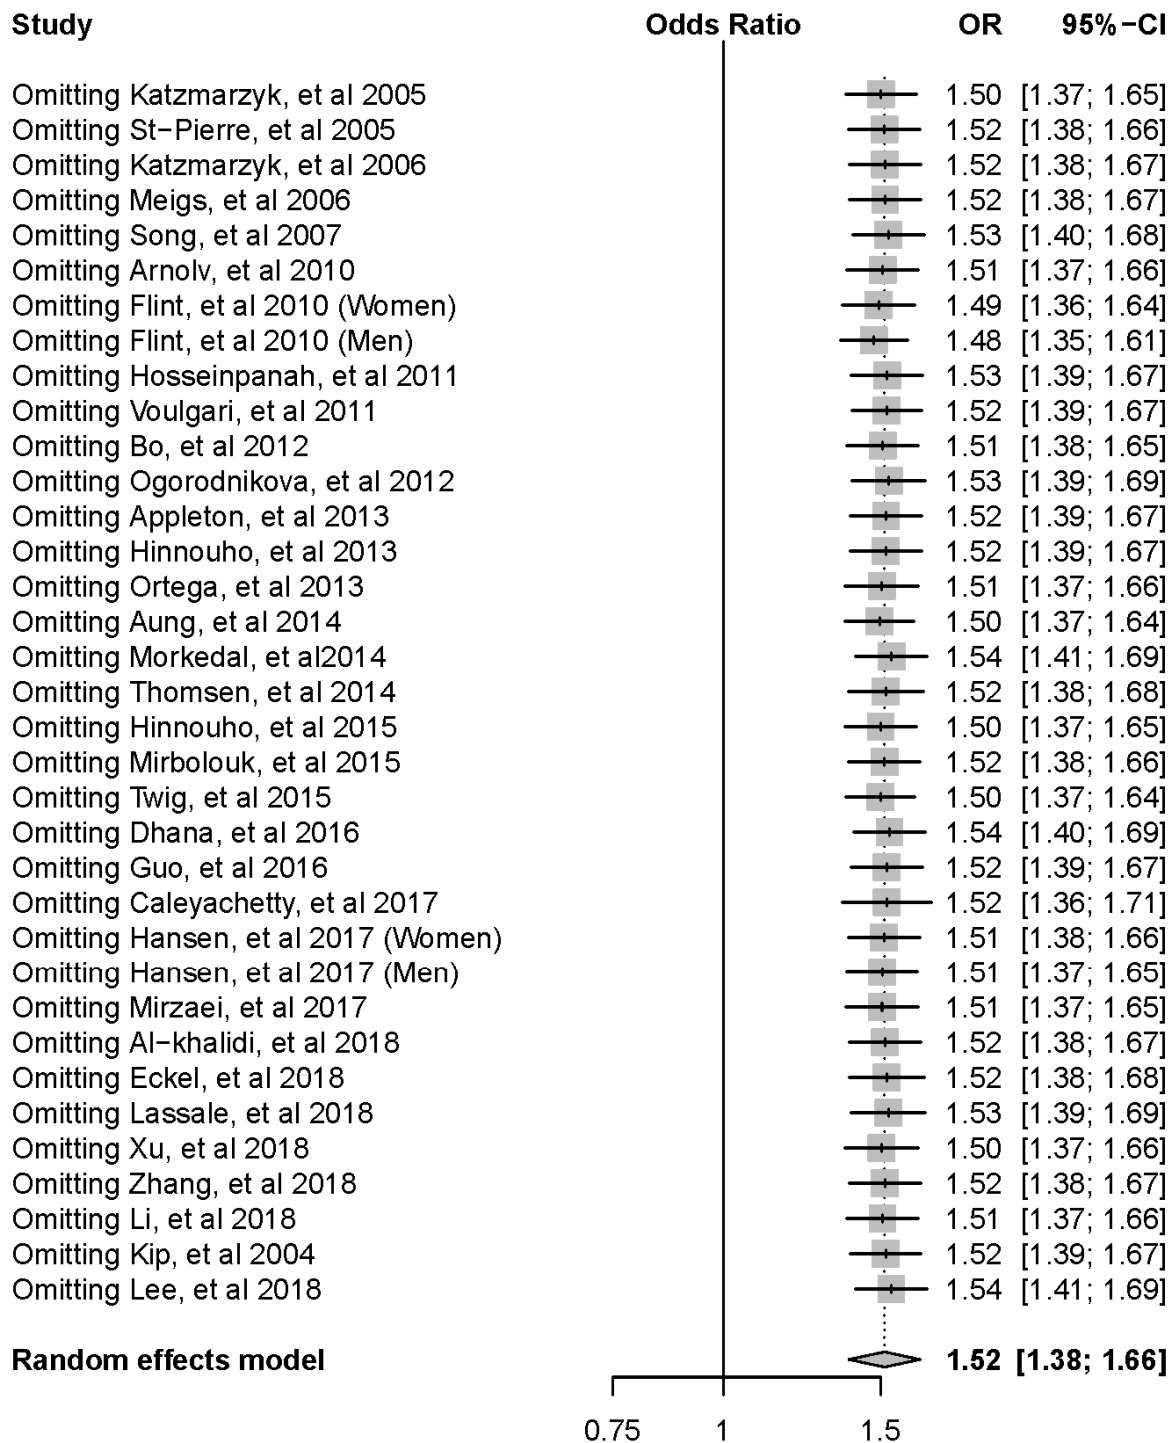

CI, confidence interval; OR, odds ratio



**Figure S9. Cumulative forest plot of risk of all-cause mortality from all included studies.**

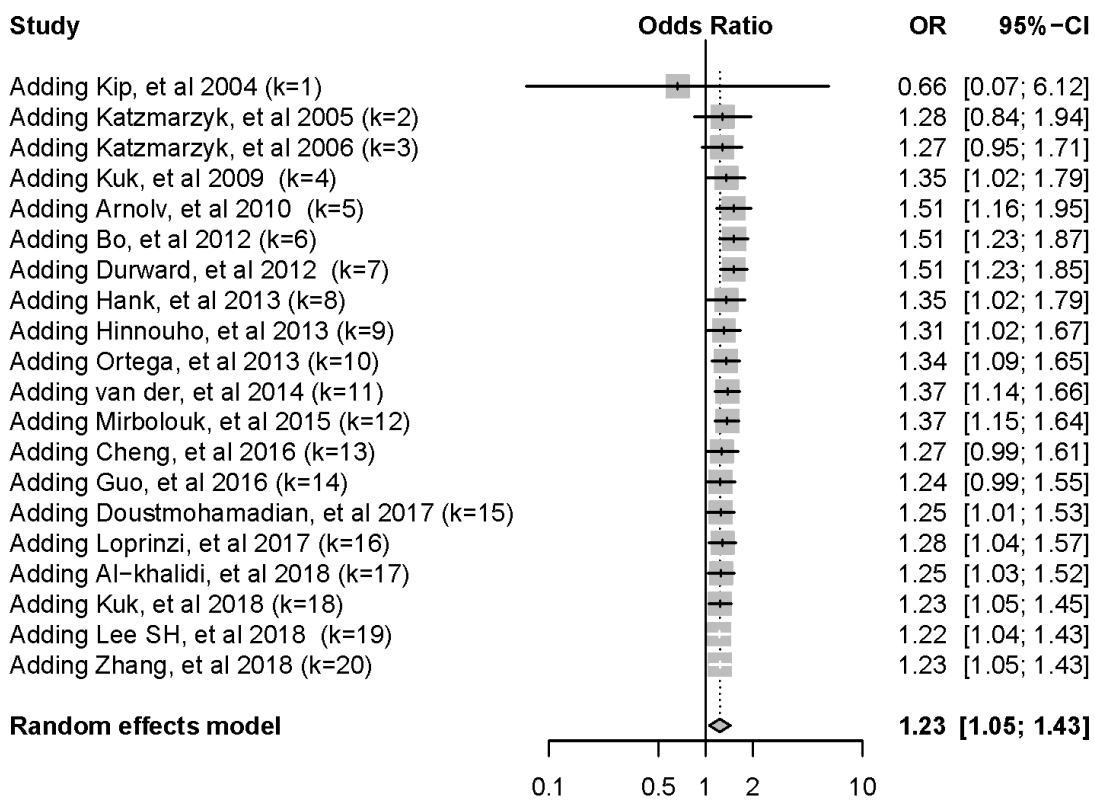

CI, confidence interval; OR, odds ratio

**Figure S10. A Forest plot of all-cause mortality, comparing participants with metabolically healthy obesity and participants with metabolically healthy normal weight, with a subgroup analysis by definitions of metabolic health.**

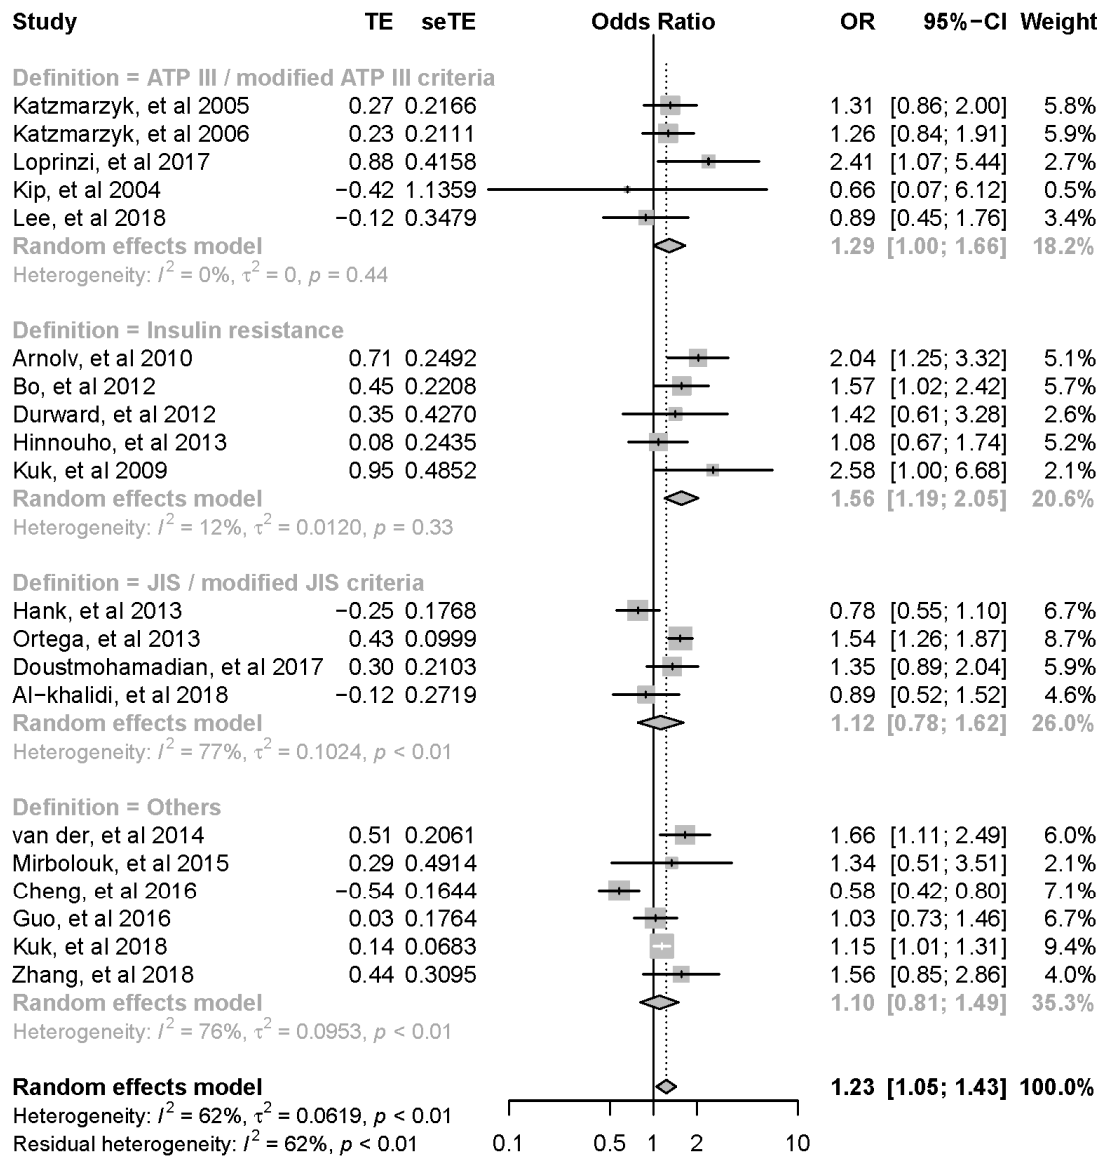

ATP III, Adult Treatment program III; CI, confidence interval; JIS, *Joint Interim Statement*; OR, odds ratio; SE, standard error; TE, treatment effect

**Figure S11. A Forest plot of all-cause mortality, comparing participants with metabolically healthy obesity and participants with metabolically healthy normal weight, with a subgroup analysis by definitions of obesity.**

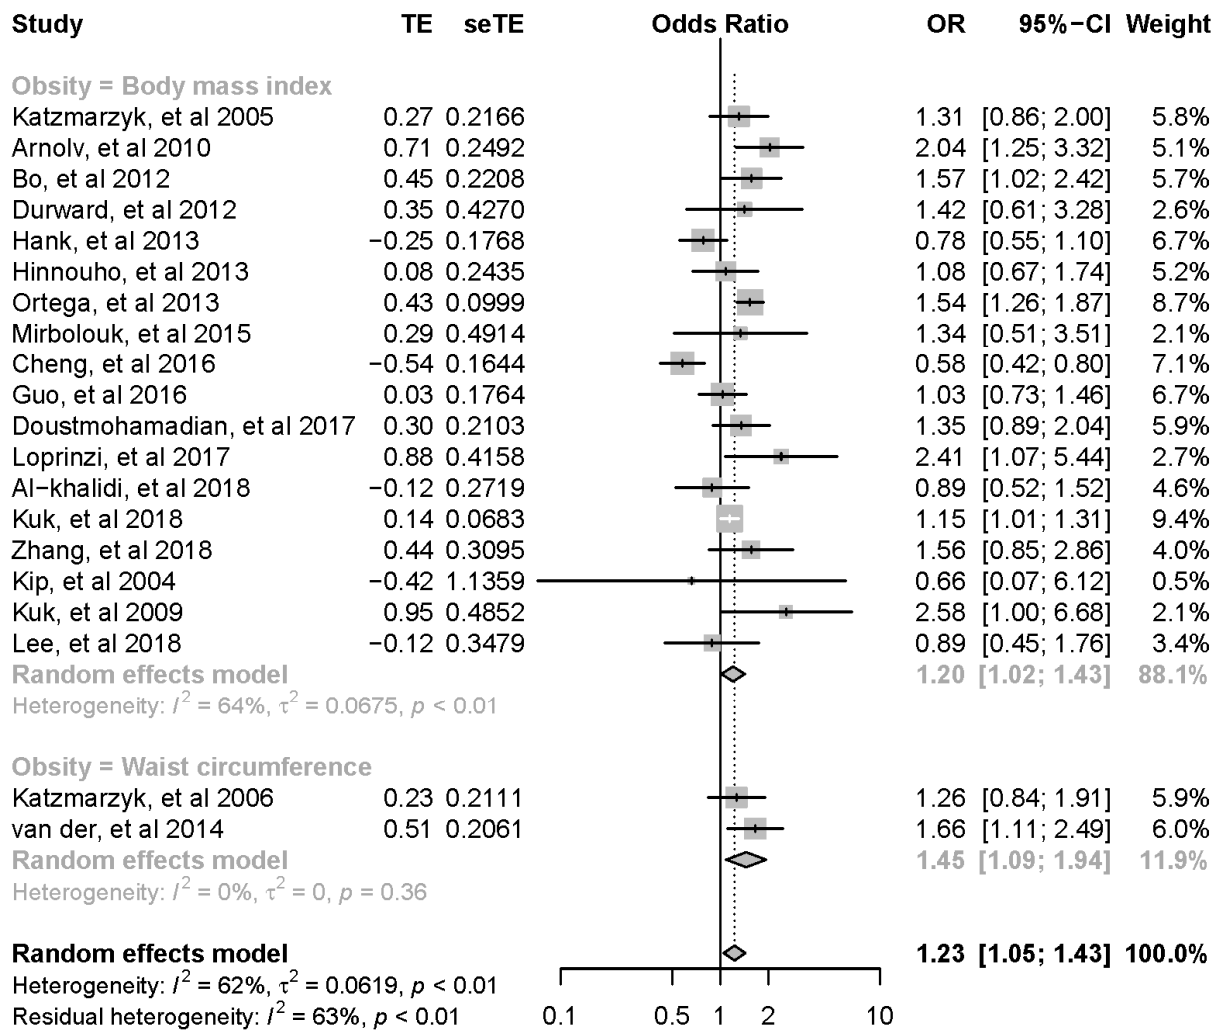

CI, confidence interval; OR, odds ratio; SE, standard error; TE, treatment effect

**Figure S12. Dose-responsive analysis of body mass index and the risk of all-cause mortality.**

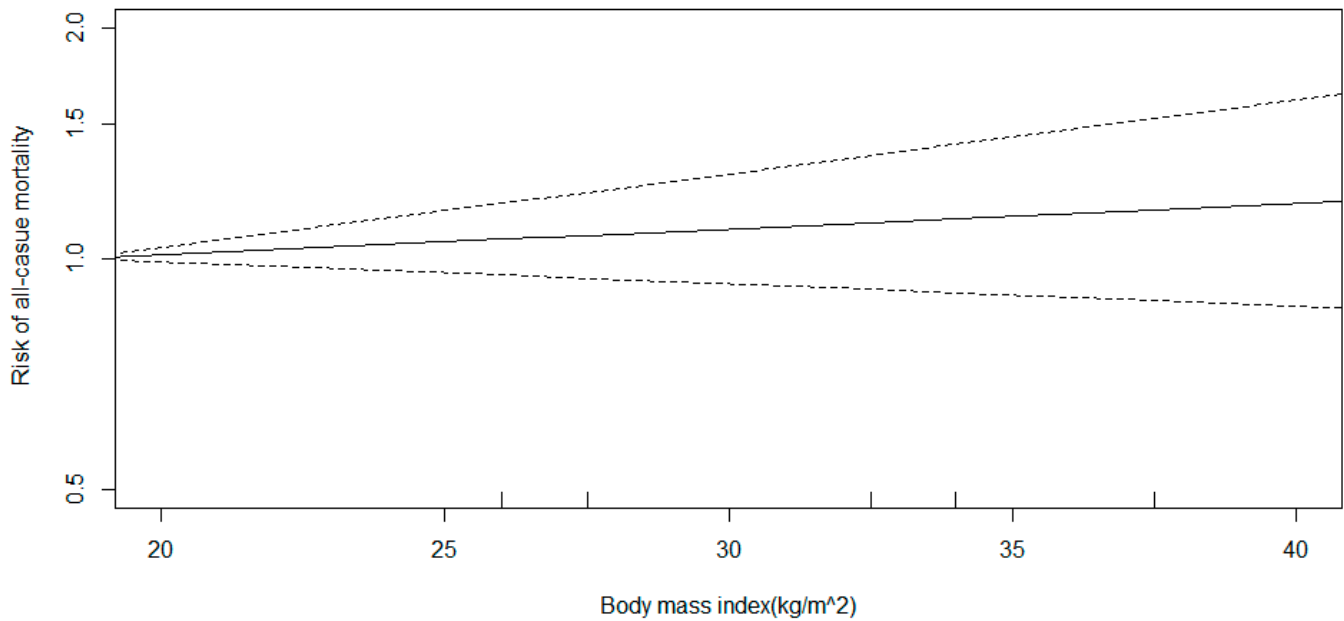

**Figure S13. Meta-regression bubble plot of the correlation between log odds ratio of all-cause mortality and age.**

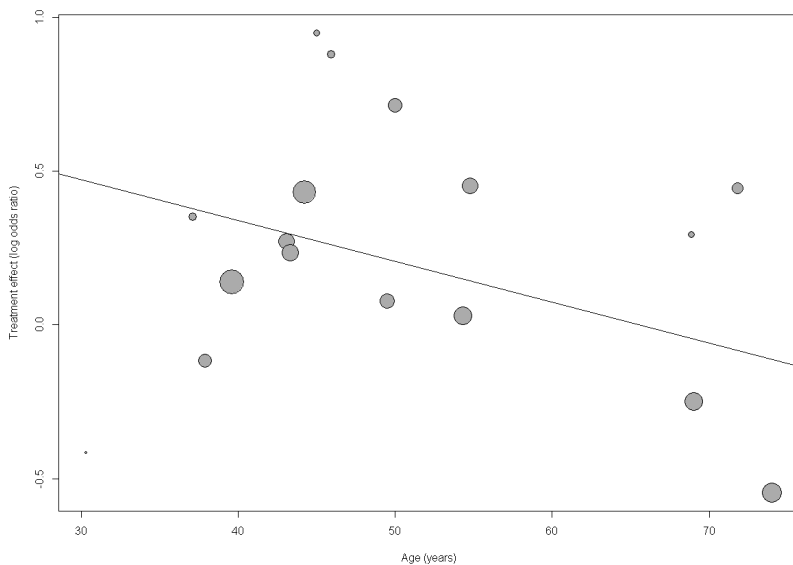

Each bubble represented a study and bubble size represented the sample size of the study. The regression line showed a borderline significant trend of declining risk with age increased.

**OR = 0.99(0.97; 1.00),  $p=0.07$  ,  $R^2$  (%)=36.5%**

**Figure S14. Meta-regression bubble plot of the correlation between log odds ratio of all-cause mortality and smoke.**

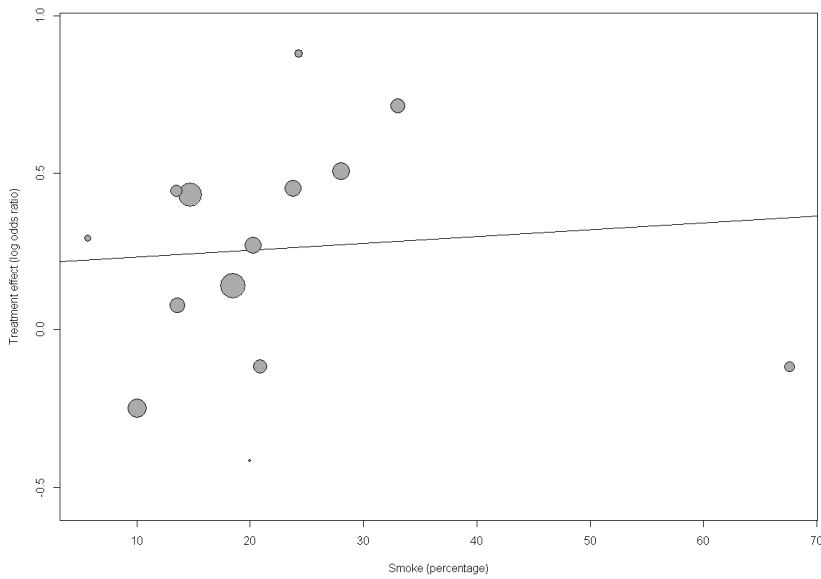

Each bubble represented a study and bubble size represented the sample size of the study. The regression line showed a non-significant trend of increased risk with smoke proportion increased. OR = 1.00(0.99; 1.02),  $p=0.77$ ,  $R^2$  (%)=0%

**Figure S15. Meta-regression bubble plot of the correlation between log odds ratio of all-cause mortality and follow-up duration.**

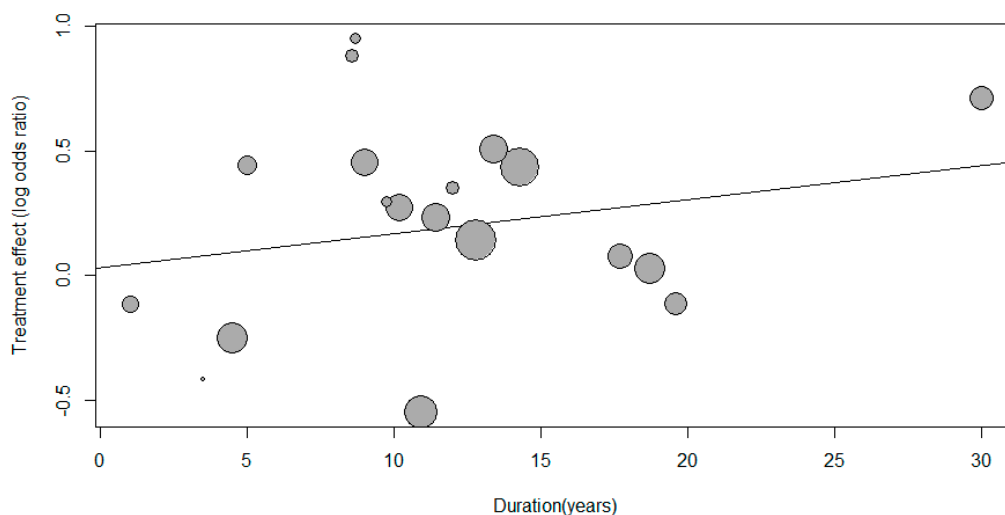

Each bubble represented a study and bubble size represented the sample size of the study. The regression line showed a non-significant trend of increased risk with follow-up year increased. OR = 1.01(0.98; 1.04),  $p=0.33$ ,  $R^2$  (%)=3.7%

**Table S4. Meta-Regression analysis of association between covariates and risk of all-cause mortality.**

|                                       | All-cause mortality    |         |                    |                    |                      |         |                    |                    |
|---------------------------------------|------------------------|---------|--------------------|--------------------|----------------------|---------|--------------------|--------------------|
|                                       | Univariate             |         |                    |                    | Multivariate         |         |                    |                    |
|                                       | Unadjusted OR (95% CI) | p value | I <sup>2</sup> (%) | R <sup>2</sup> (%) | Adjusted OR (95% CI) | p value | I <sup>2</sup> (%) | R <sup>2</sup> (%) |
| <b>Sex</b>                            |                        |         |                    |                    |                      |         |                    |                    |
| Men                                   | 1(Reference)           | NA      |                    |                    | 1(Reference)         | NA      |                    |                    |
| Women                                 | 0.50(0.26; 0.98)       | 0.04    | 53.1               | 44.4               | 0.49(0.28; 0.87)     | 0.02    | 53.1               | 44.4               |
| <b>Age</b> , per year increase        | 0.99(0.97; 1.00)       | 0.07    | 57.7               | 36.5               | 0.98(0.97; 1.00)     | 0.02    | 8.9 <sup>a</sup>   | 95.5 <sup>a</sup>  |
| <b>Smoke status</b>                   |                        |         |                    |                    |                      |         |                    |                    |
| Non-smoker                            | 1(Reference)           | NA      |                    |                    |                      |         |                    |                    |
| Smoker                                | 1.00(0.99; 1.02)       | 0.77    | 57.1               | 0                  |                      |         |                    |                    |
| Follow up duration, per year increase | 1.01(0.98; 1.04)       | 0.33    | 67.8               | 3.7                |                      |         |                    |                    |

CI, confidence interval; NA, not applicable; OR, odds ratio

<sup>a</sup> covariates women and age

**Figure S16. Meta-regression of log odds ratio for all-cause mortality in people with metabolically healthy obesity relative to women proportion.**

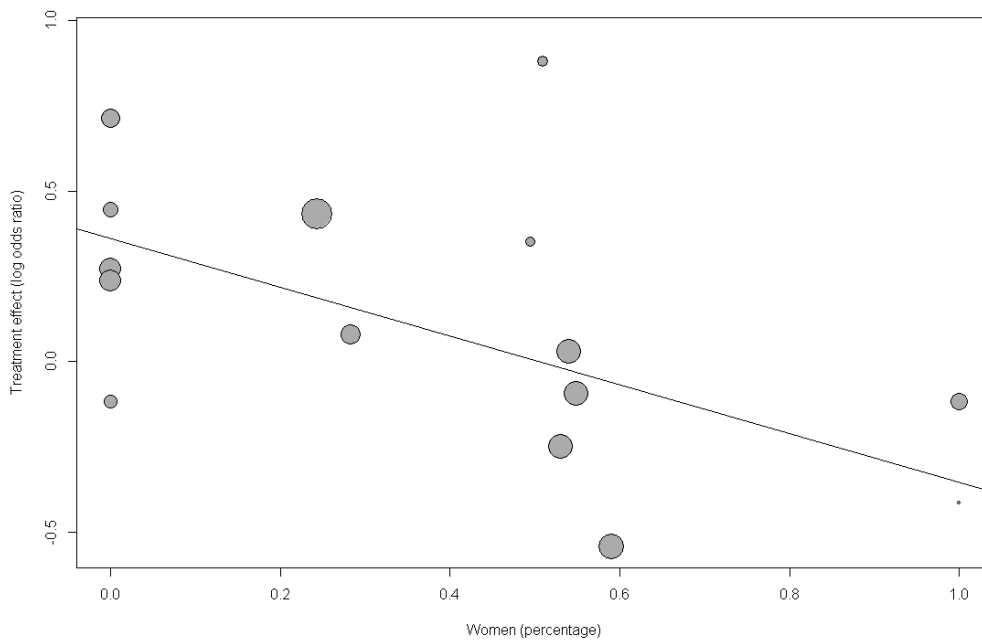

Each bubble represented a study and bubble size represented the sample size of the study. The regression line showed a significant trend of declining risk with larger women proportion.

**OR=0.50(0.26; 0.98),  $p=0.04$   $R^2$  (%)=44.4%**

**Figure S17. The funnel plot standard error and odds ratio of all-cause mortality showing study dispersion.**

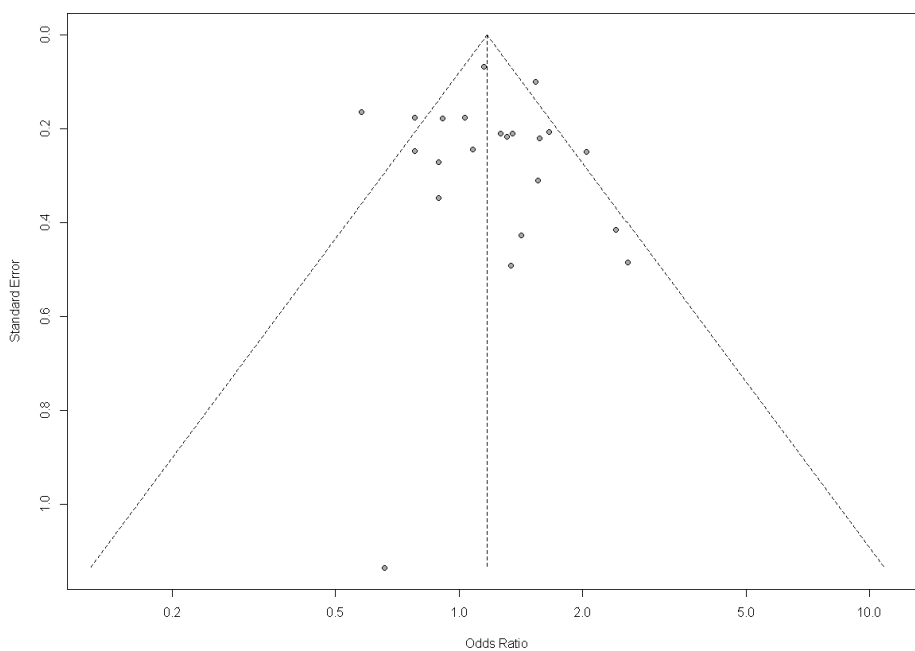

Egger test, slope=0.13,  $p = 0.62$

**Figure S18. Sensitivity analyses of metabolically healthy obesity and risk of all-cause mortality by omitting each study.**

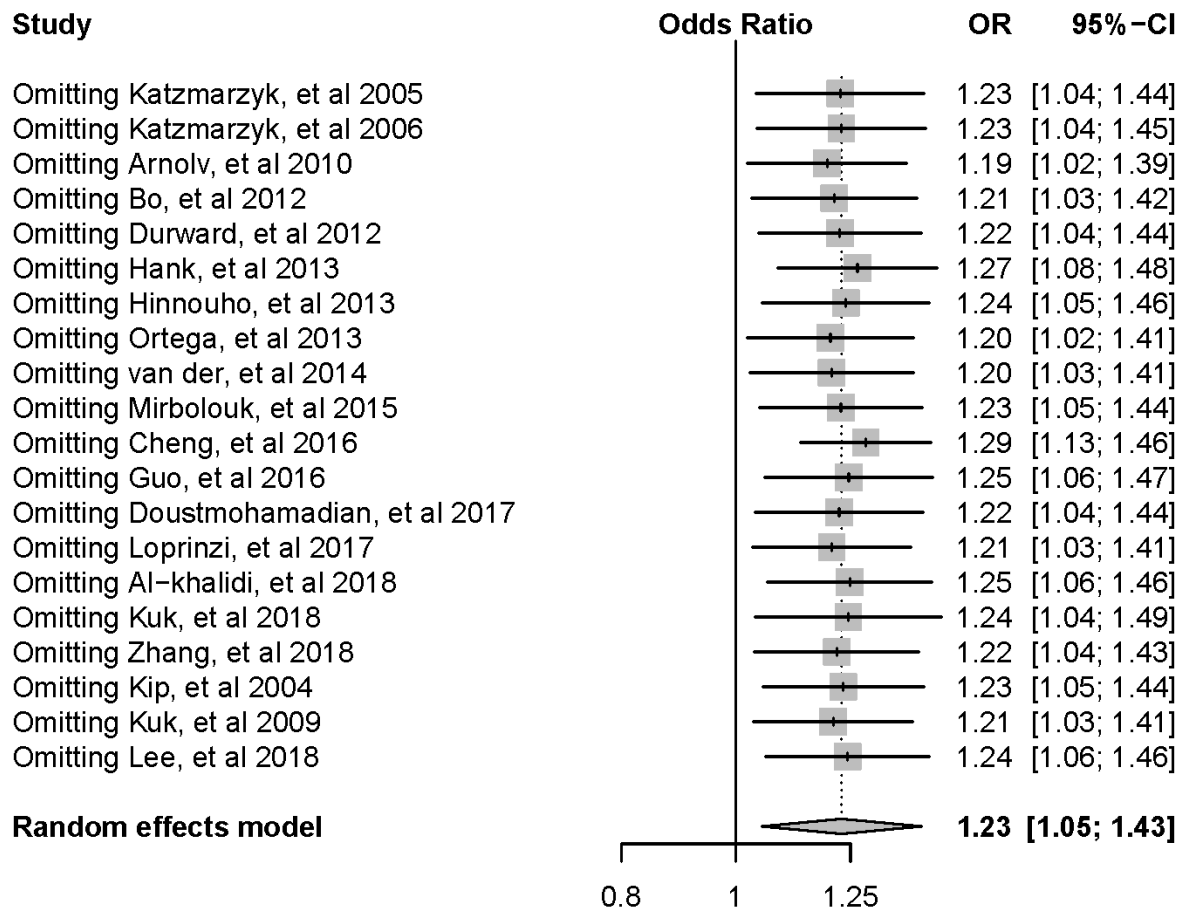

confidence interval; OR, odds ratio
